# Supplementary material for: Pharmacogenetic meta-analysis of baseline risk factors, pharmacodynamic, efficacy and tolerability endpoints from two large global cardiovascular outcomes trials for darapladib
Source: PubMed Central journal article supplement (PMC5533343; doi:10.1371/journal.pone.0182115), 2017-07-28

### S3 Fig. Regional, forest and box plots of novel loci associated with baseline Lp-PLA2 activity.

Regional, forest and box plots of mean difference (MD) of novel loci (with greater than 10 copies of variant alleles) associated with baseline lipoprotein-associated phospholipase A2 activity at genome-wide (a&b) and candidate gene (c) significance. The dashed line in the region plots indicates the significance threshold.

**a**

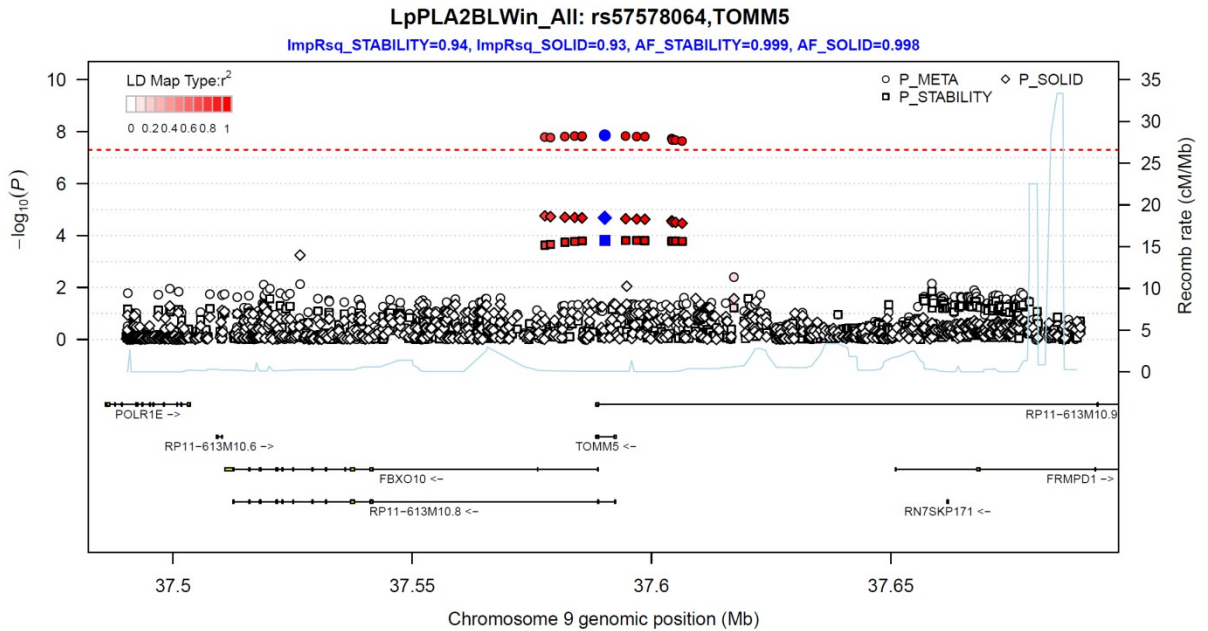

| Study                     | MD            | 95%-CI                  | Rsq  | Allele | Freq  | N            | P               |
|---------------------------|---------------|-------------------------|------|--------|-------|--------------|-----------------|
| <b>STABILITY</b>          | -35.88        | [-54.47; -17.30]        | 0.94 | G      | 0.999 | 12640        | 1.54e-04        |
| <b>SOLID</b>              | -30.54        | [-44.60; -16.48]        | 0.93 | G      | 0.998 | 9516         | 2.08e-05        |
| <b>Fixed effect model</b> | <b>-32.49</b> | <b>[-43.70; -21.27]</b> |      |        |       | <b>22156</b> | <b>1.36e-08</b> |

Mean difference

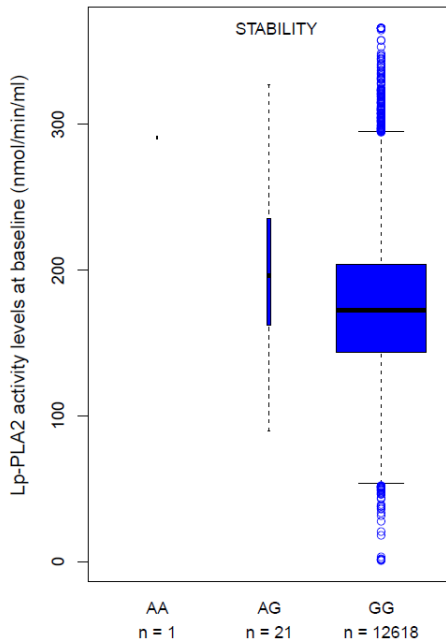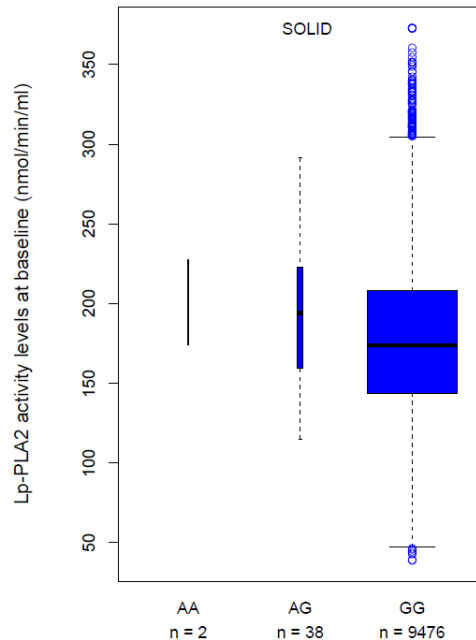

S3 Fig. b

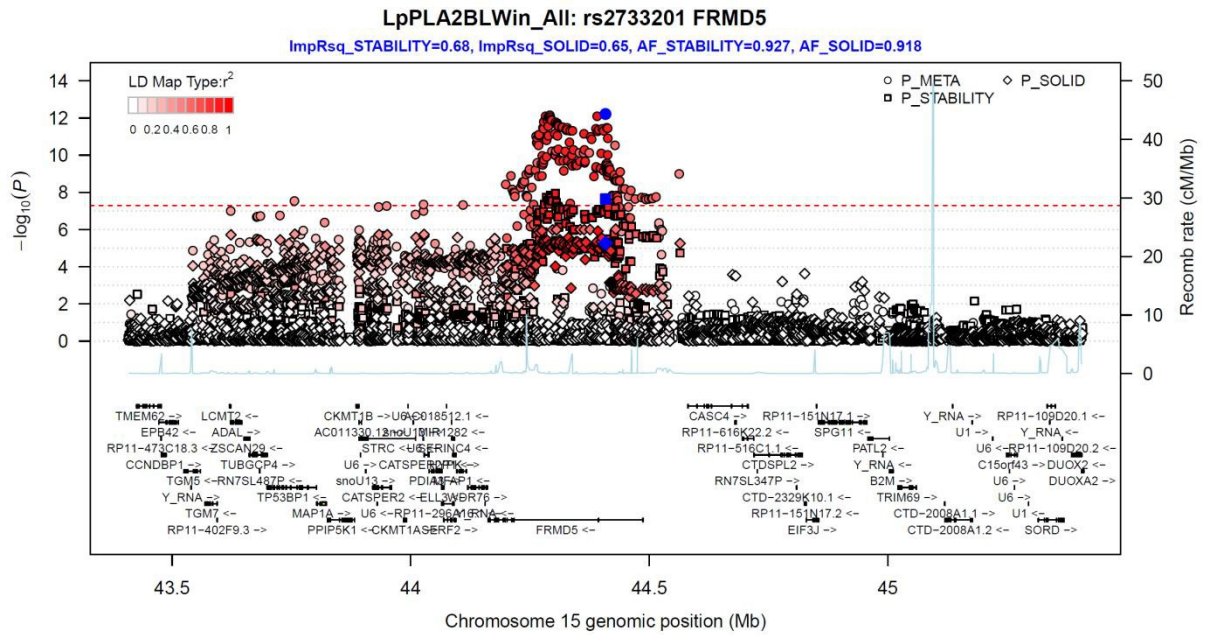

| Study                     | MD   | 95%-CI        | Rsq  | Allele | Freq  | N     | P        |
|---------------------------|------|---------------|------|--------|-------|-------|----------|
| <b>STABILITY</b>          | 7.51 | [4.88; 10.14] | 0.68 | C      | 0.927 | 12640 | 2.28e-08 |
| <b>SOLID</b>              | 7.03 | [4.00; 10.06] | 0.65 | C      | 0.918 | 9516  | 5.29e-06 |
| <b>Fixed effect model</b> | 7.30 | [5.32; 9.29]  |      |        |       | 22156 | 5.87e-13 |

Mean difference

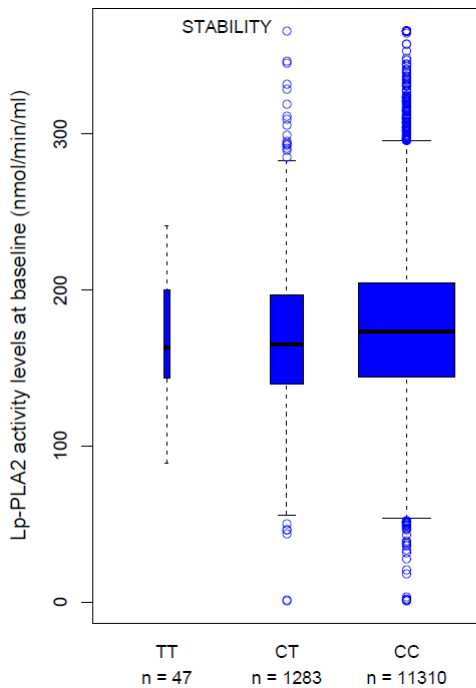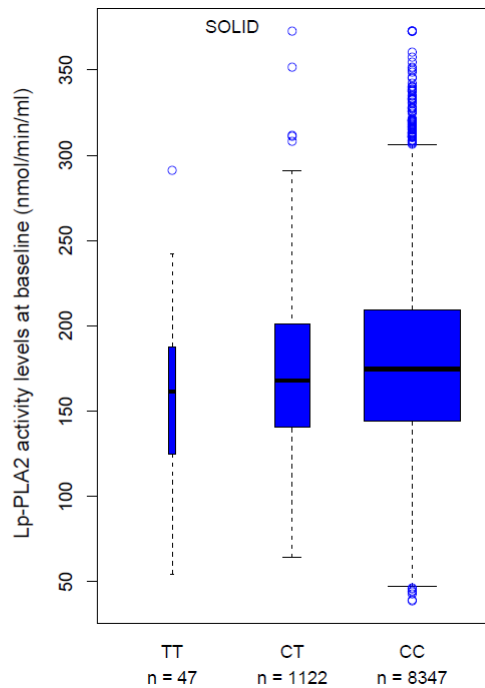

S3 Fig. c

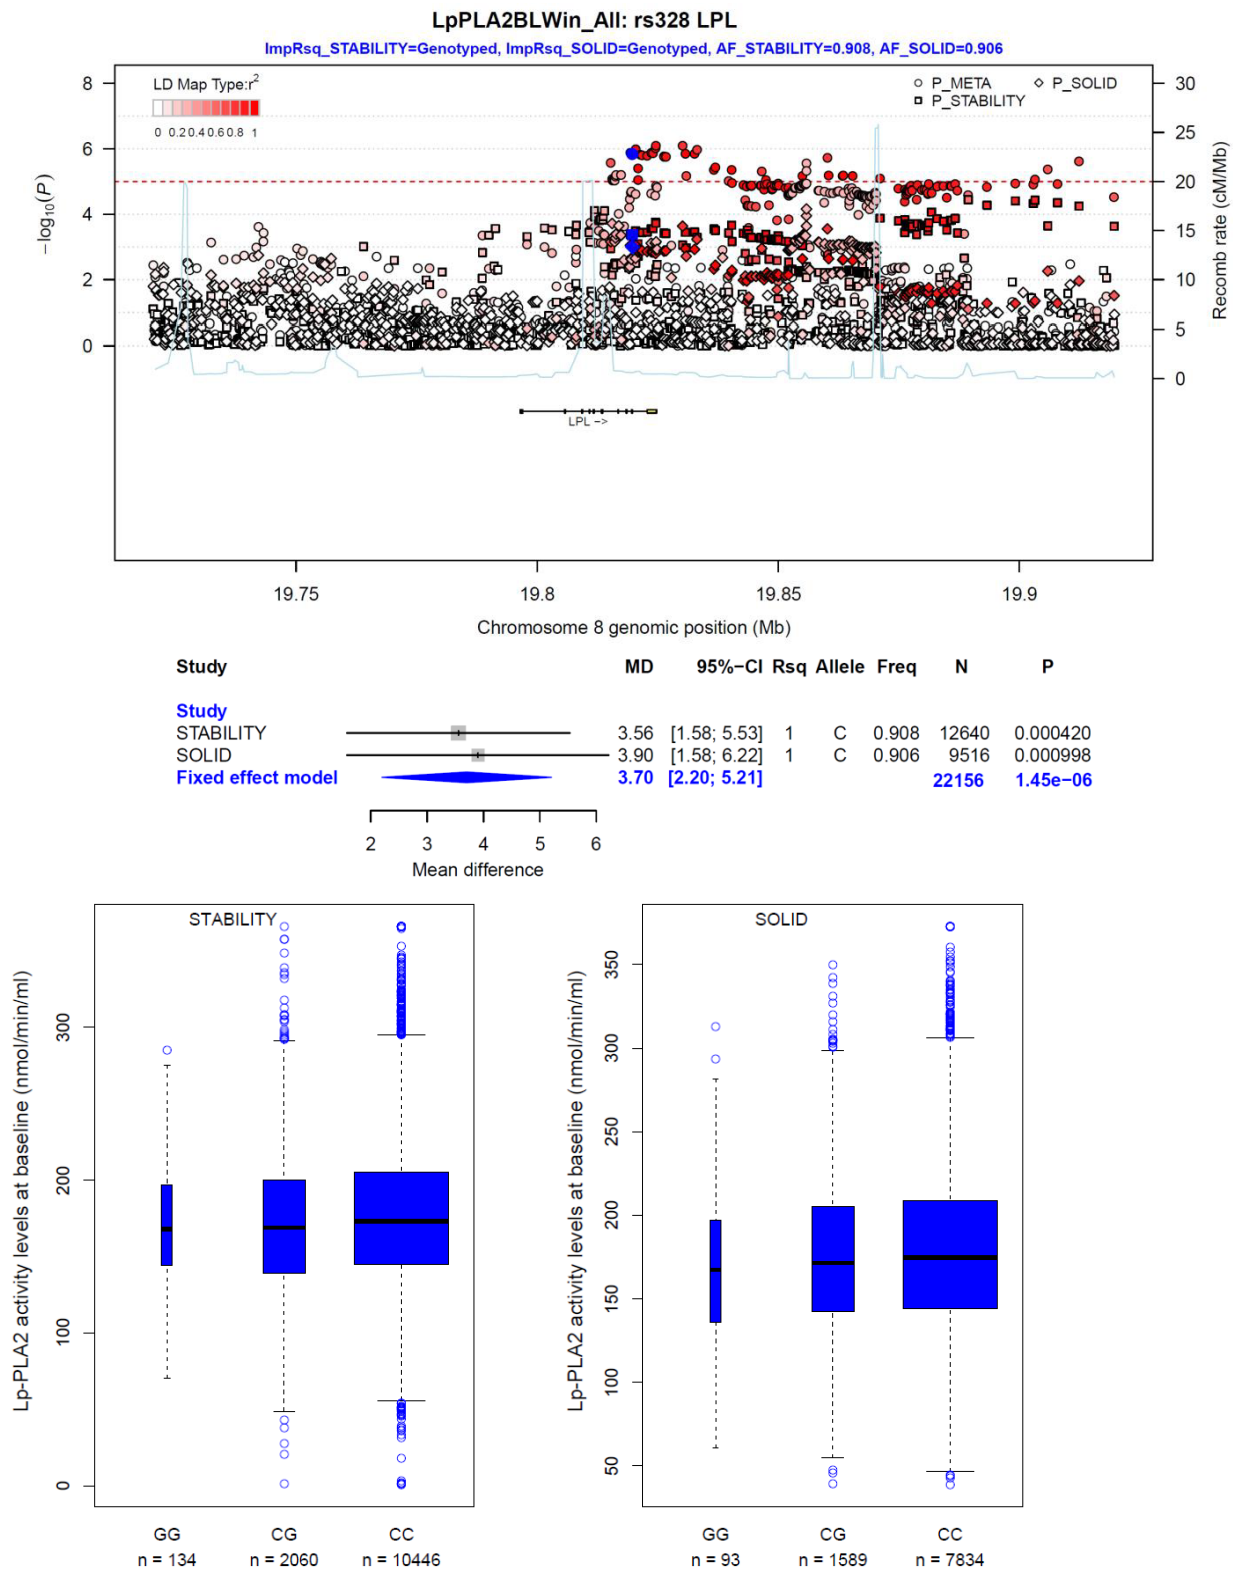

Supplement: pone.0182115.s004.pdf [file pone.0182115.s004.pdf]
