# Supplementary material for: Pharmacogenetic meta-analysis of baseline risk factors, pharmacodynamic, efficacy and tolerability endpoints from two large global cardiovascular outcomes trials for darapladib
Source: PubMed Central journal article supplement (PMC5533343; doi:10.1371/journal.pone.0182115), 2017-07-28

**S4 Fig. Manhattan, QQ and histogram plots for efficacy endpoints.** For MCE: a) main genotype effect p value in placebo arm, b) main genotype effect p value in darapladiib, c) genotype by treatment interaction p value, and d) 2df test p value for both main genotype and genotype by treatment interaction; For MI: e) main genotype effect p value in placebo arm, f) main genotype effect p value in darapladiib, g) genotype by treatment interaction p value, and h) 2df test p value for both main genotype and genotype by treatment interaction.

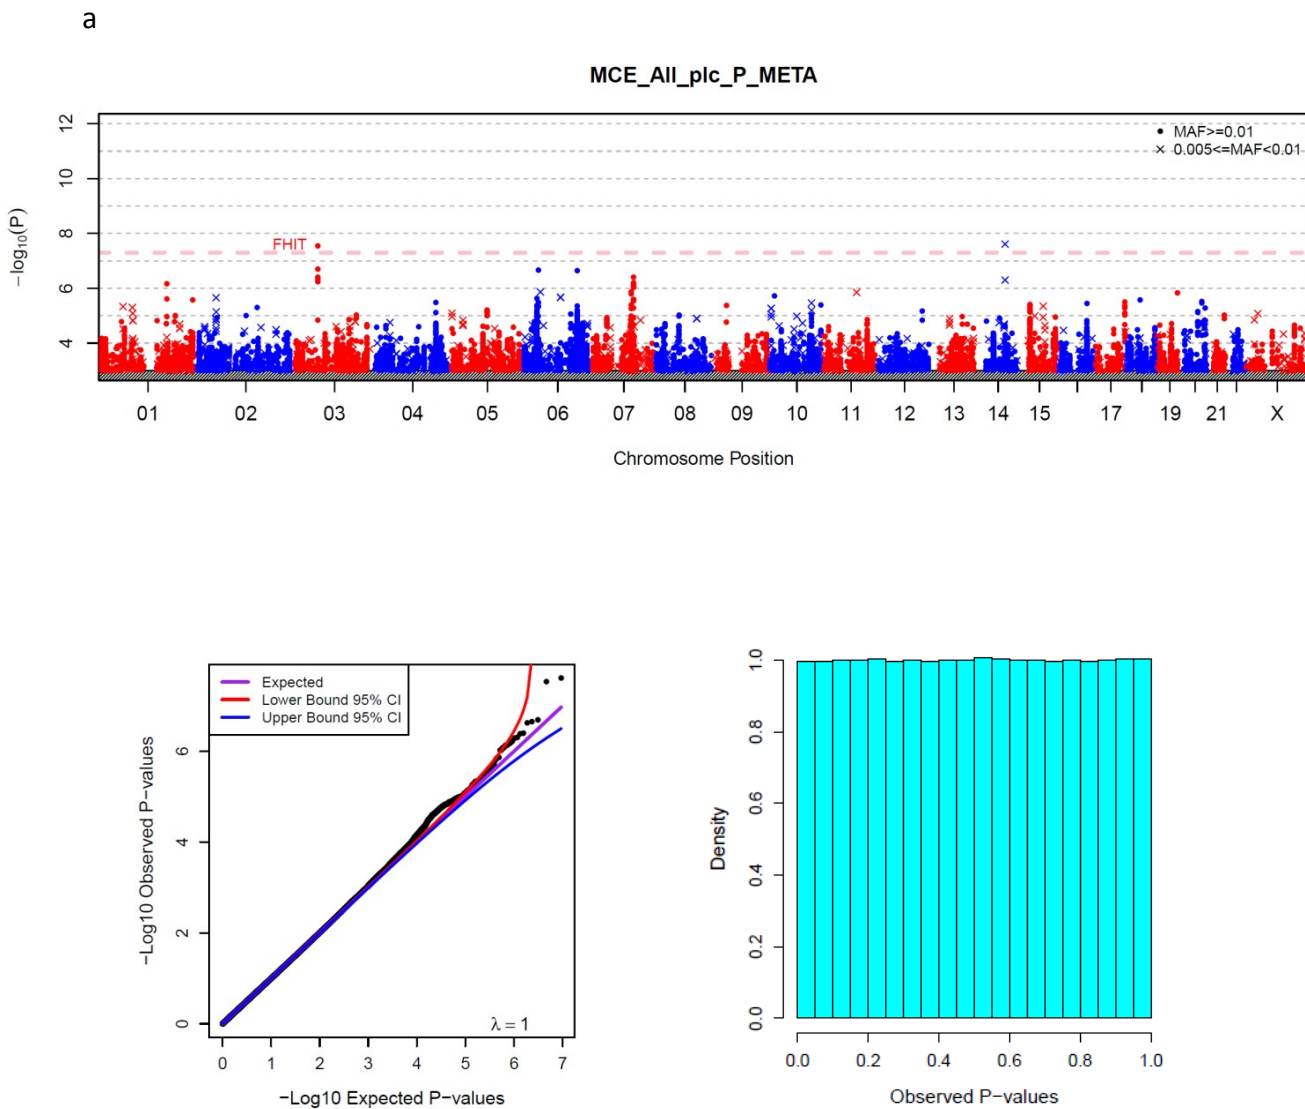

S4 Fig. b

MCE\_All\_trt\_P\_META

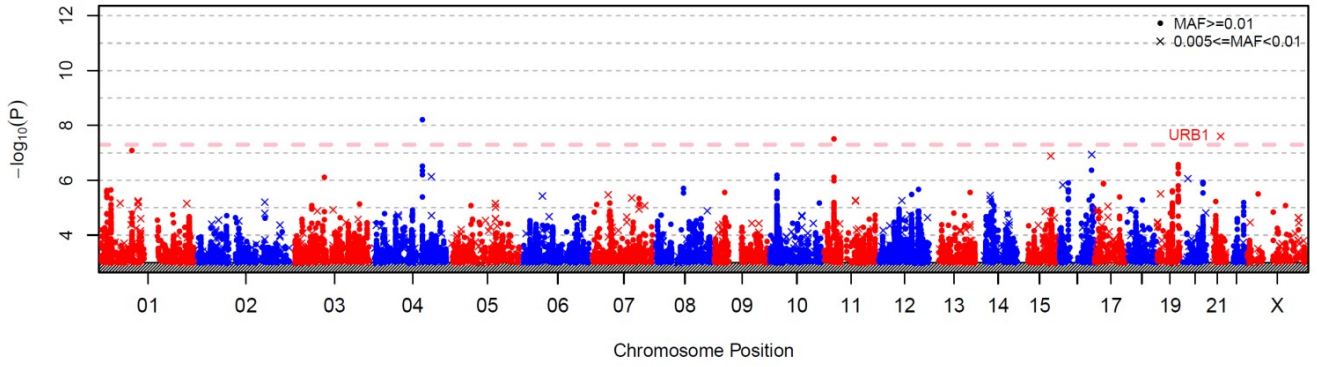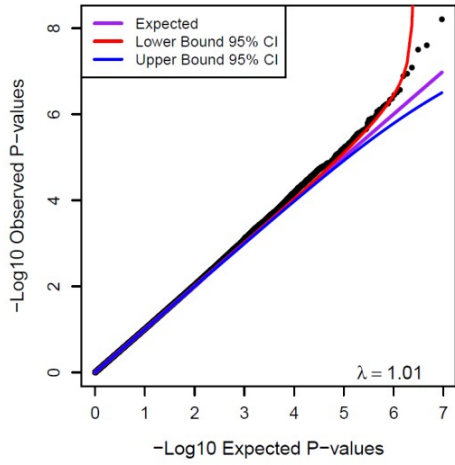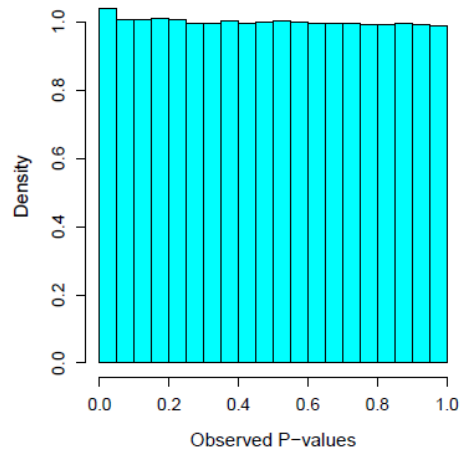

S4 Fig. c

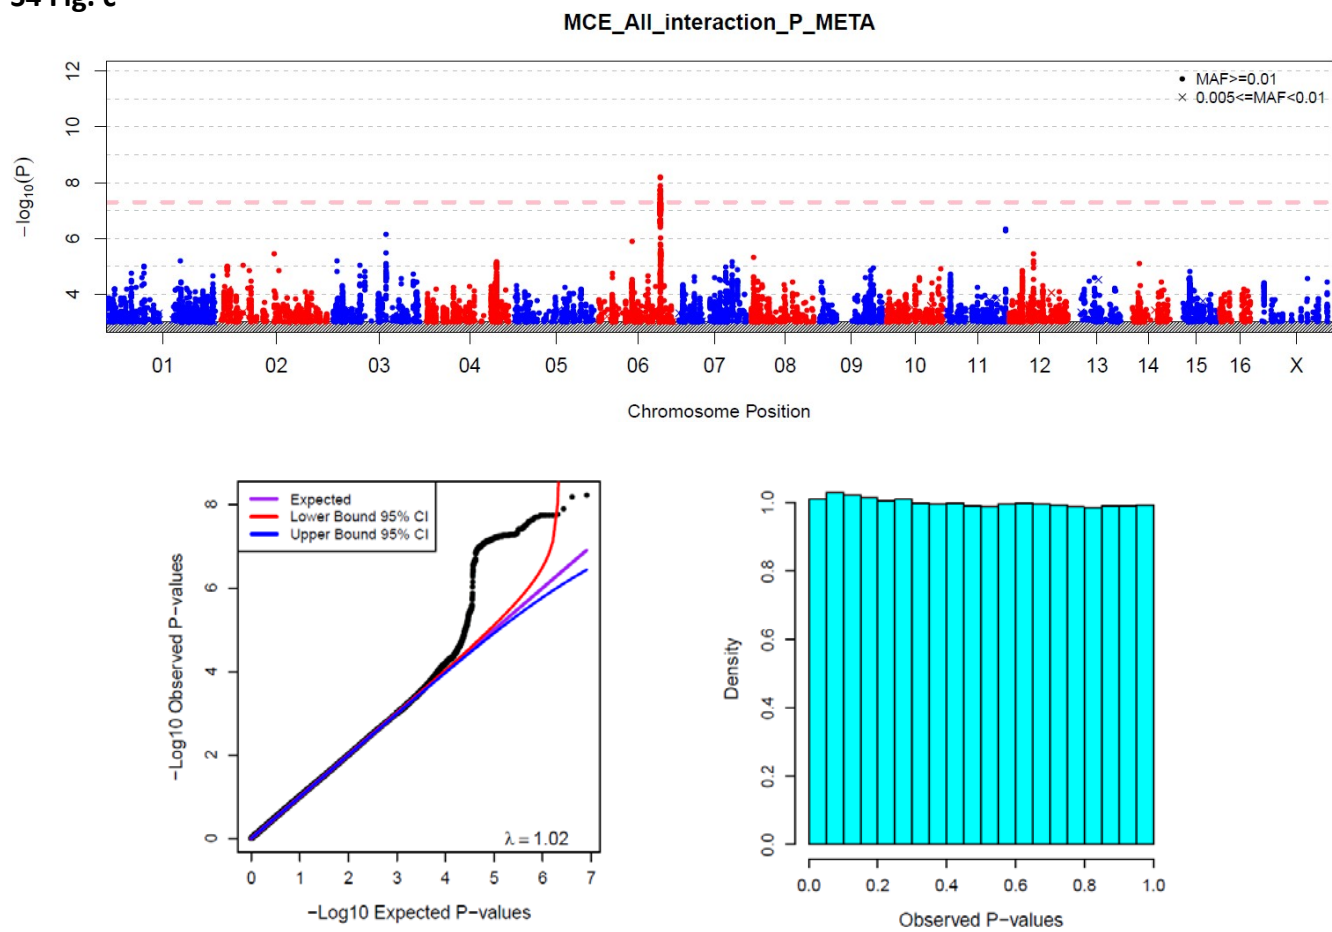

S4 Fig. d

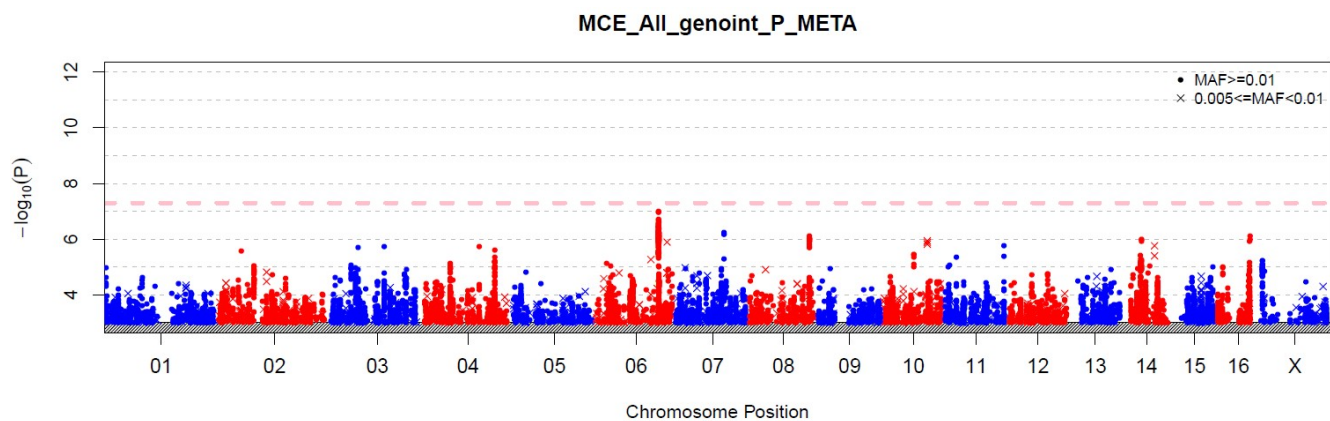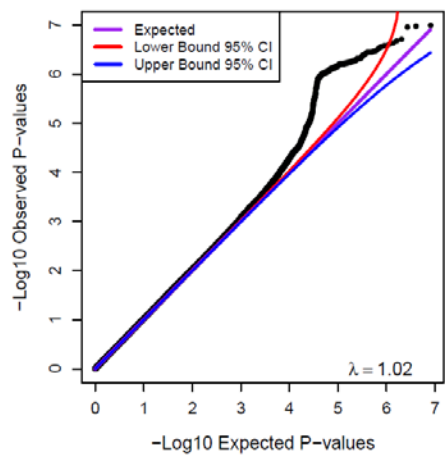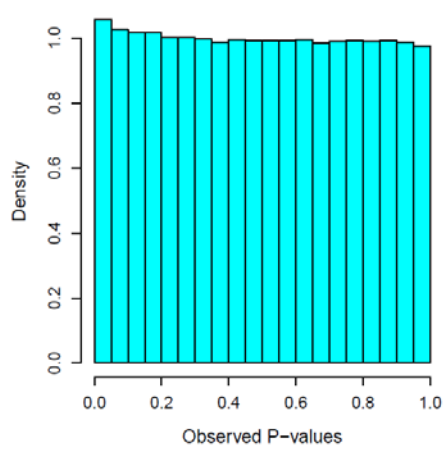

S4 Fig. e

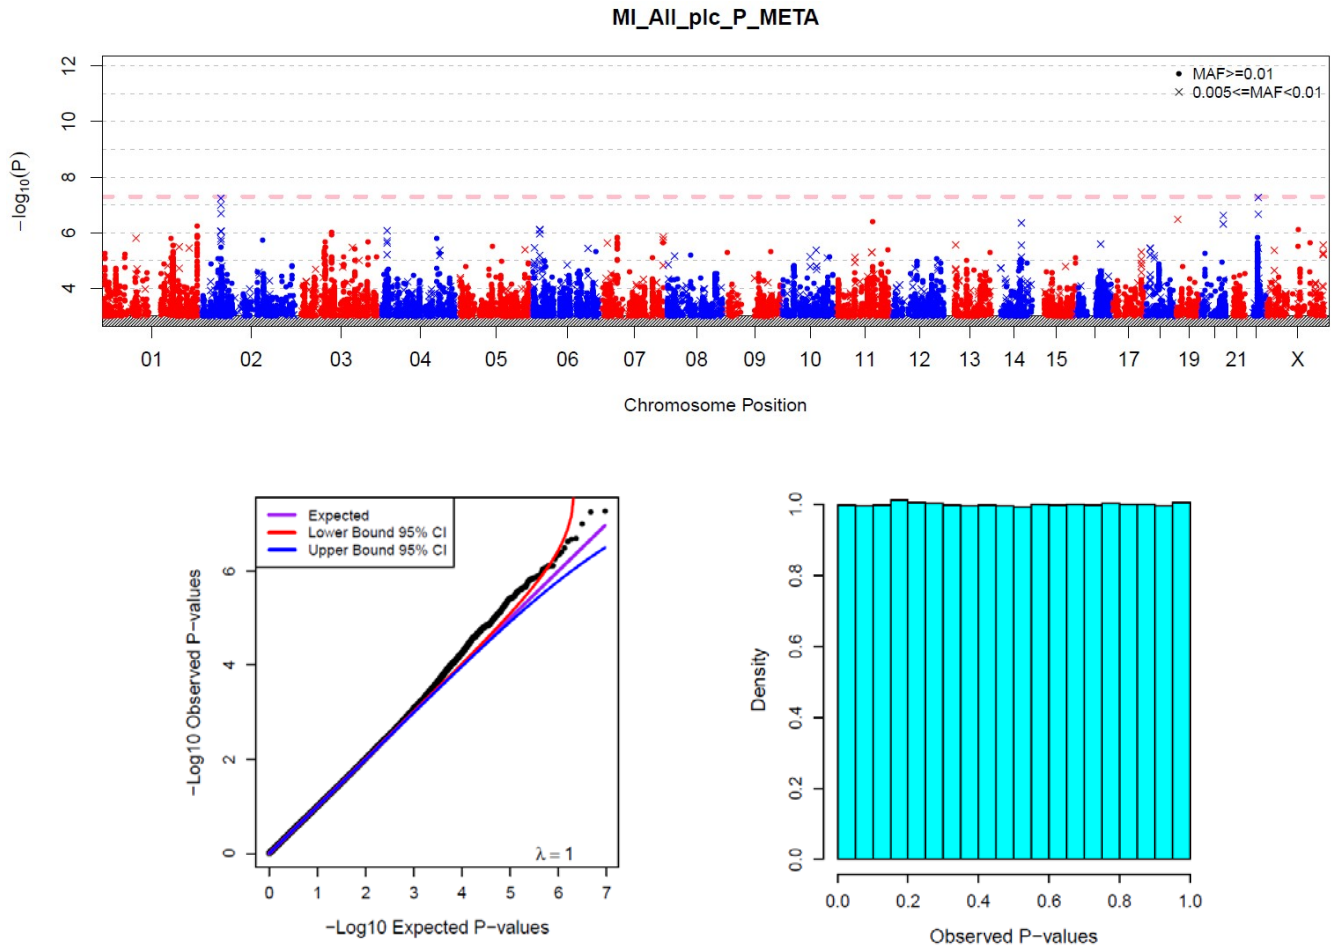

S4 Fig. f

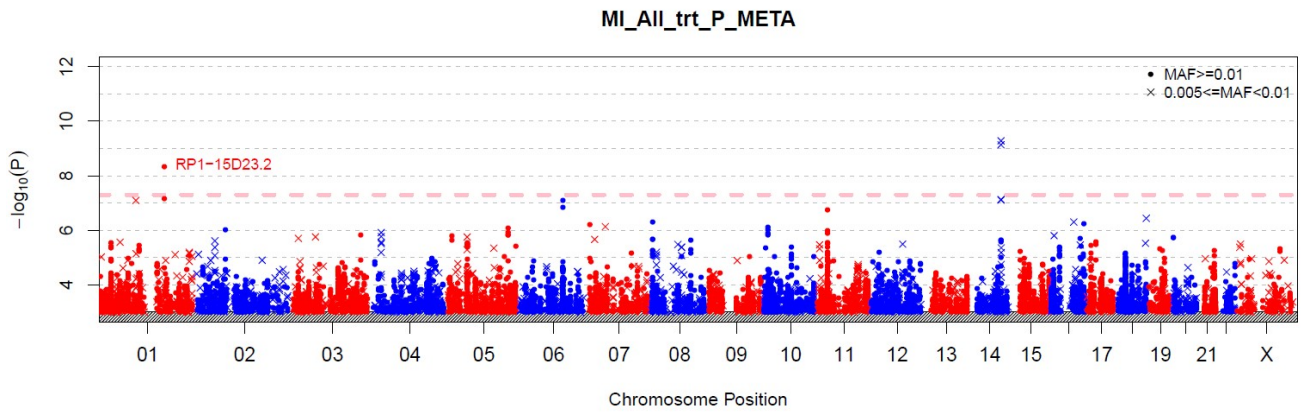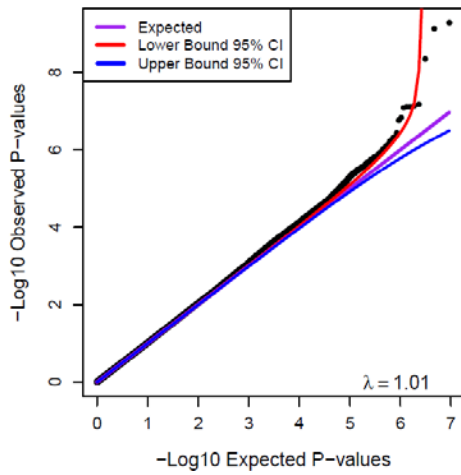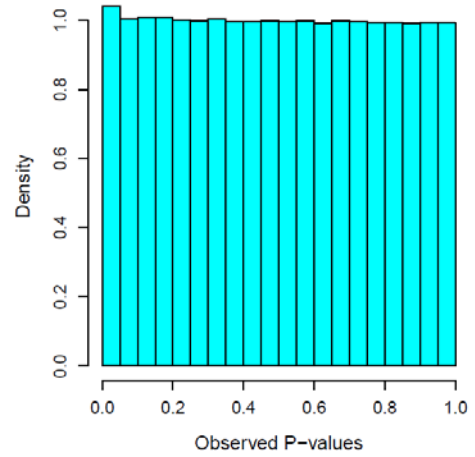

S4 Fig. g

MI\_All\_interaction\_P\_META

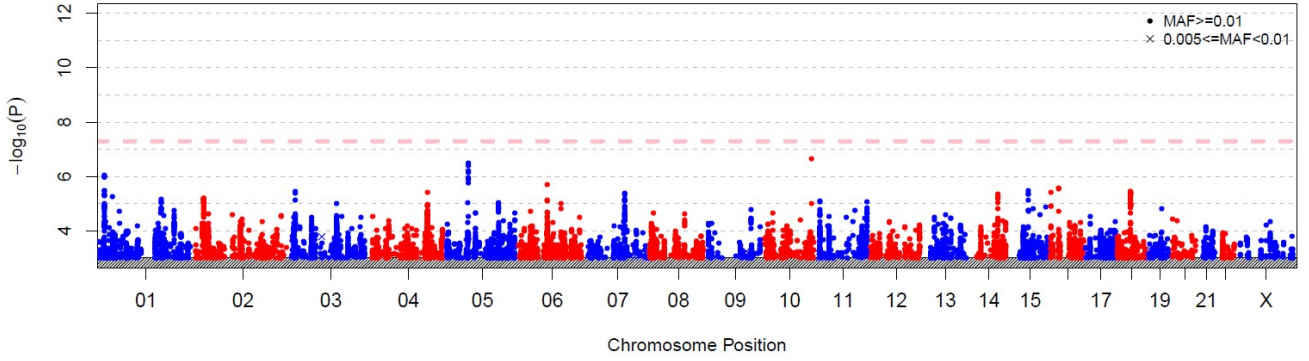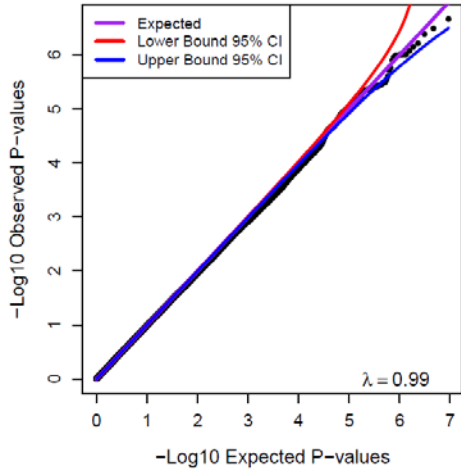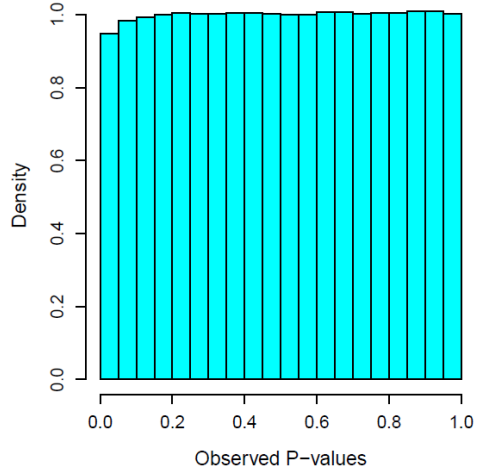

S4 Fig. h

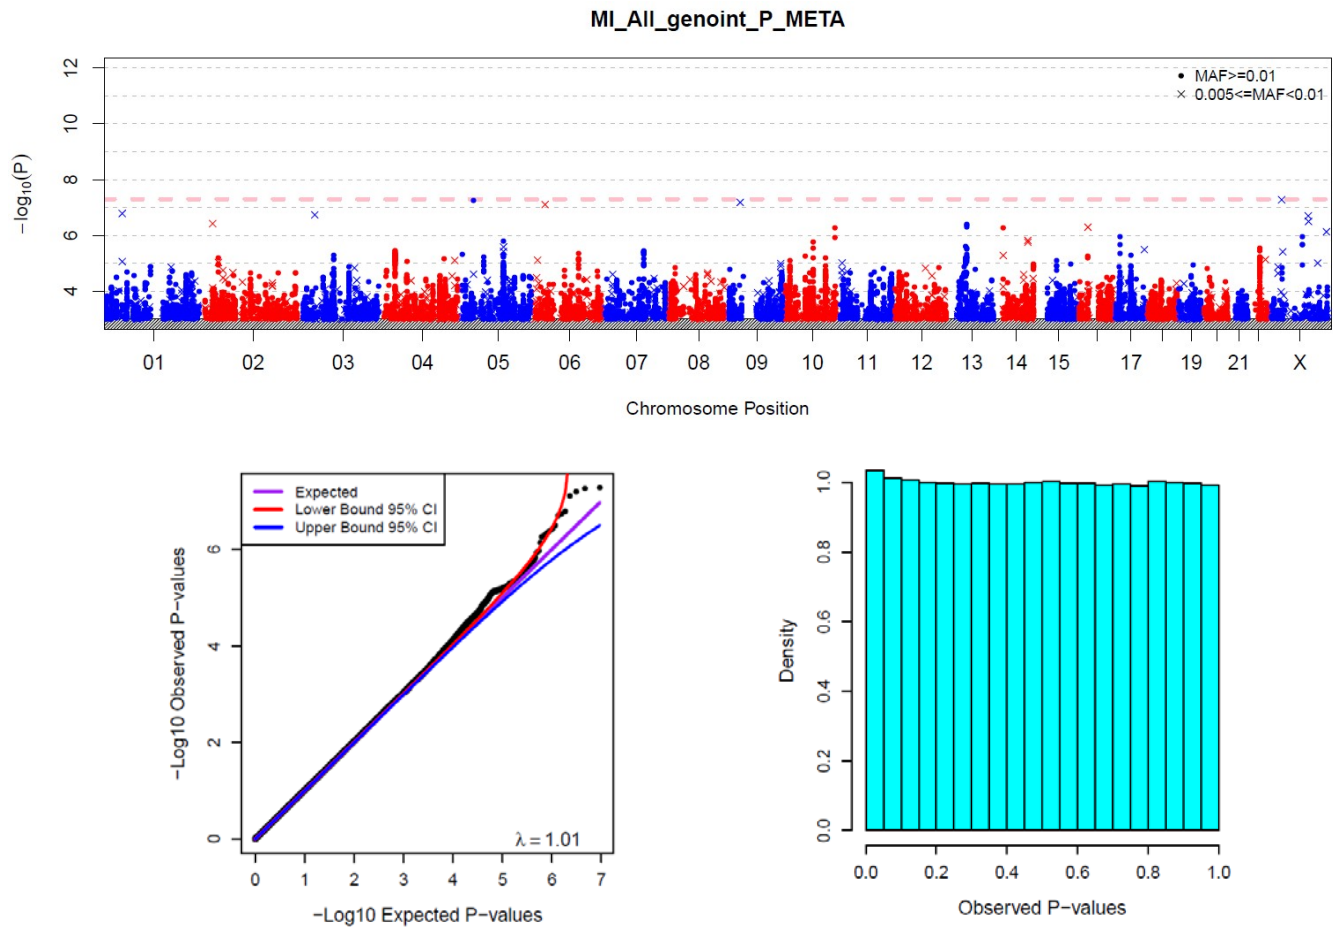

Supplement: pone.0182115.s005.pdf [file pone.0182115.s005.pdf]
