# Supplementary material for: Pharmacogenetic meta-analysis of baseline risk factors, pharmacodynamic, efficacy and tolerability endpoints from two large global cardiovascular outcomes trials for darapladib
Source: PubMed Central journal article supplement (PMC5533343; doi:10.1371/journal.pone.0182115), 2017-07-28

**S5 Fig. Regional, survival and forest plots of variants associated with MCE following placebo and darapladib treatment.** The dashed line in the regional plots indicates the significance threshold. a) rs138741635 , b) rs192427471, c) rs181937009, d) rs12290663, e) rs147204125.

S5 Fig. a

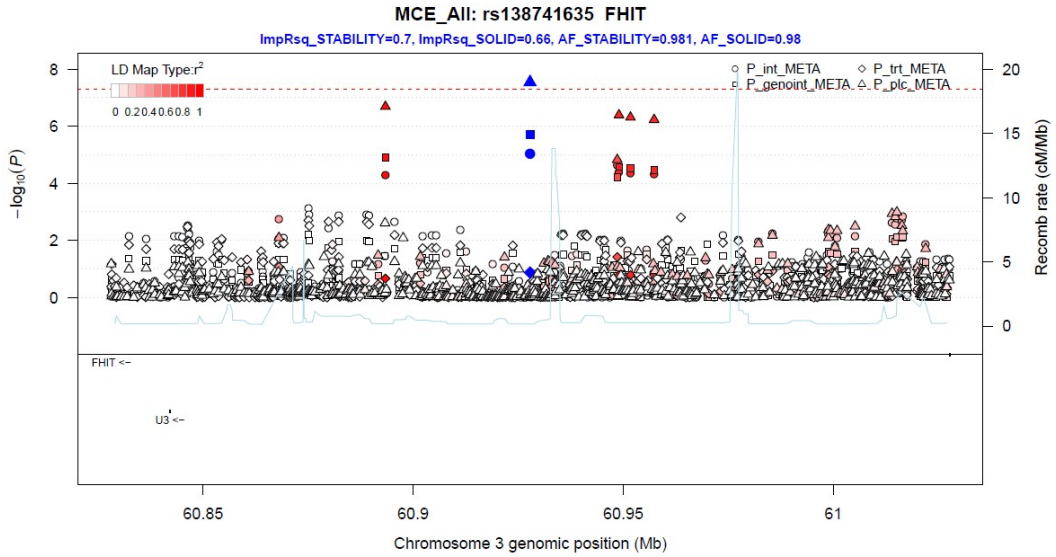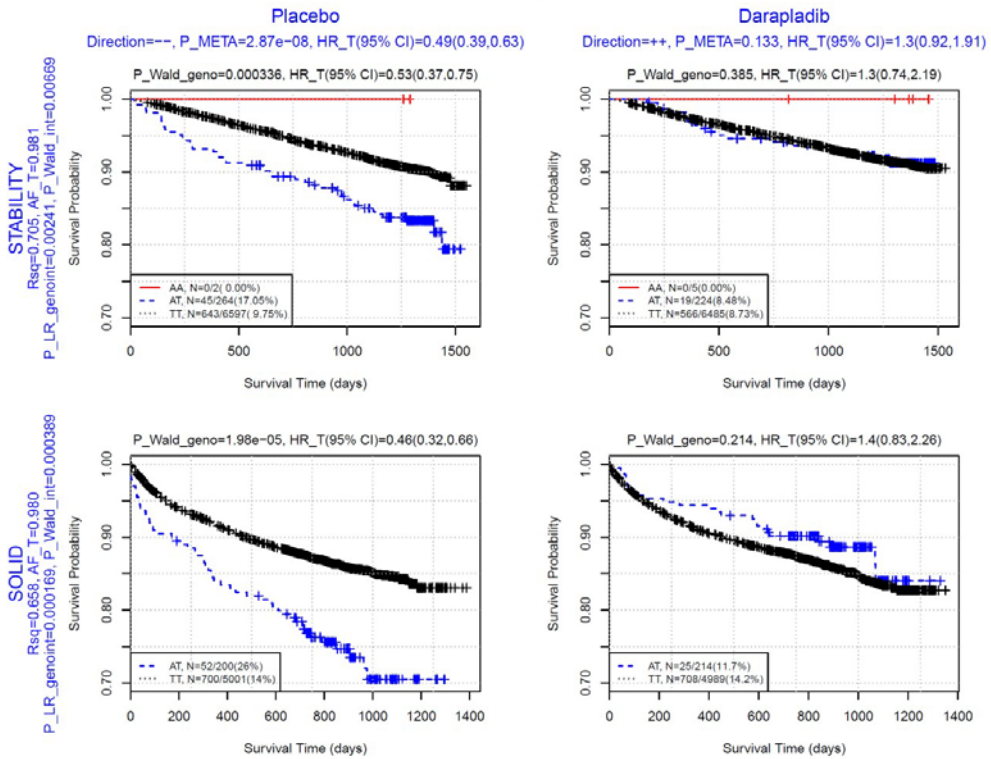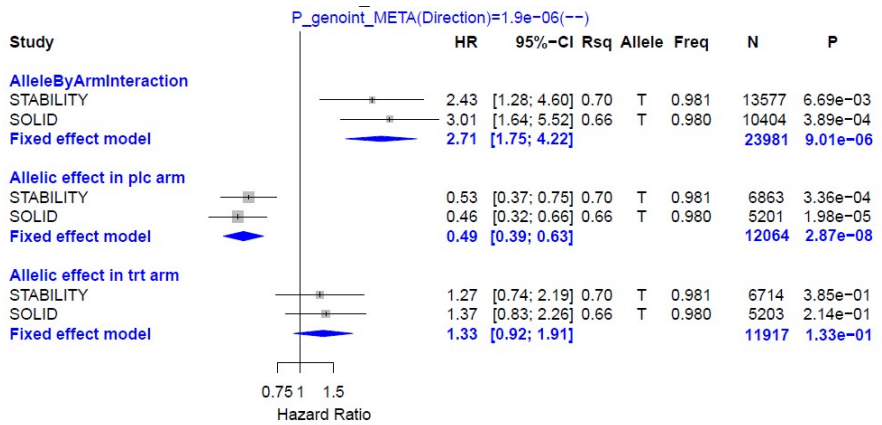

S5 Fig. b

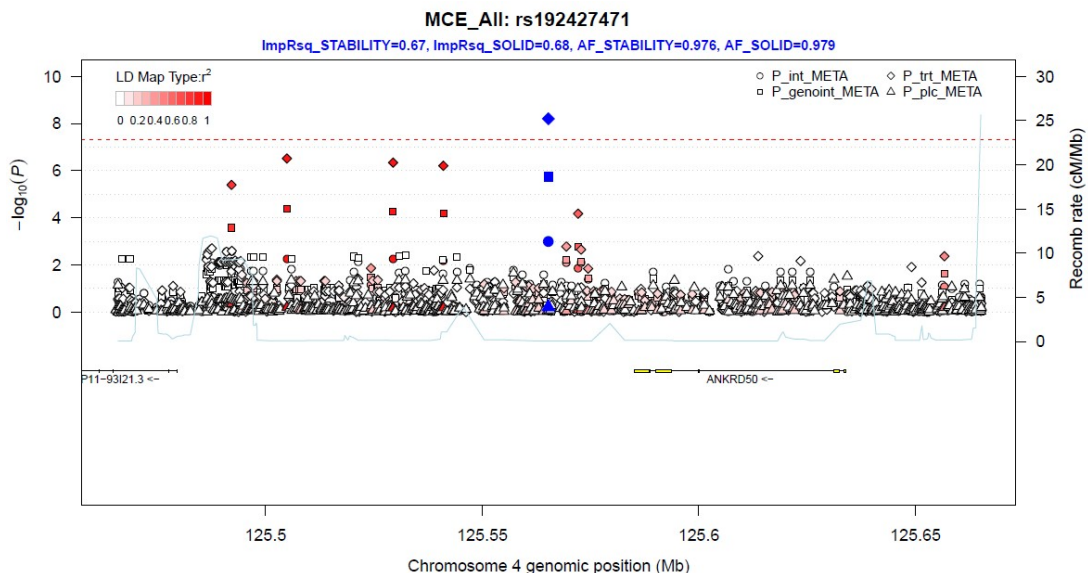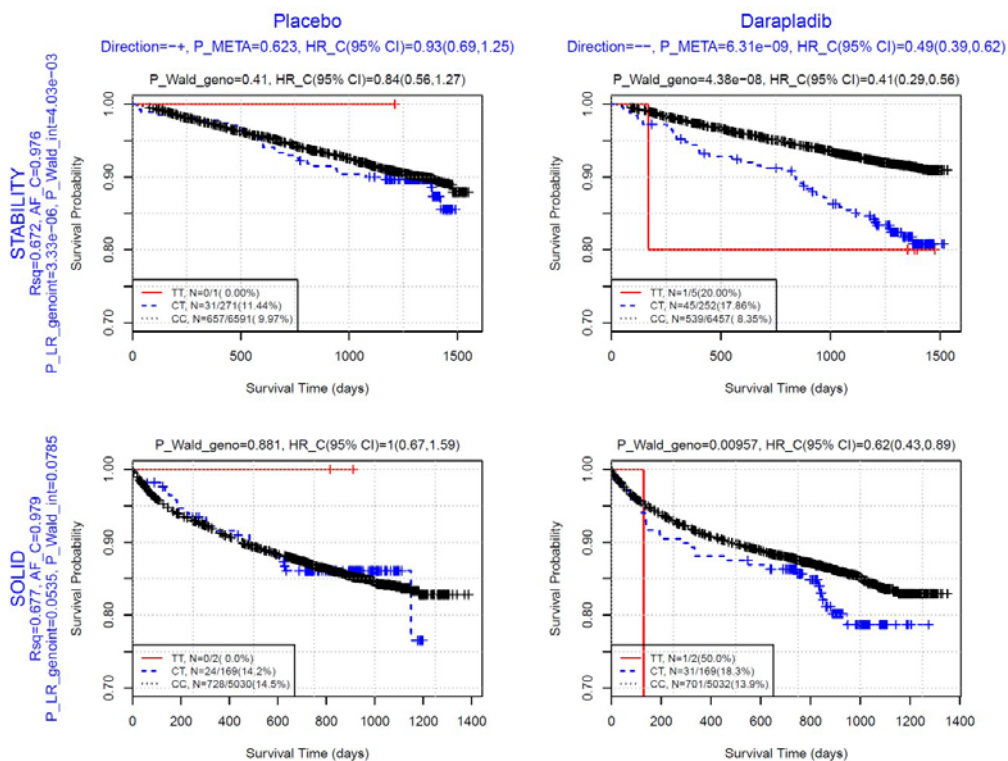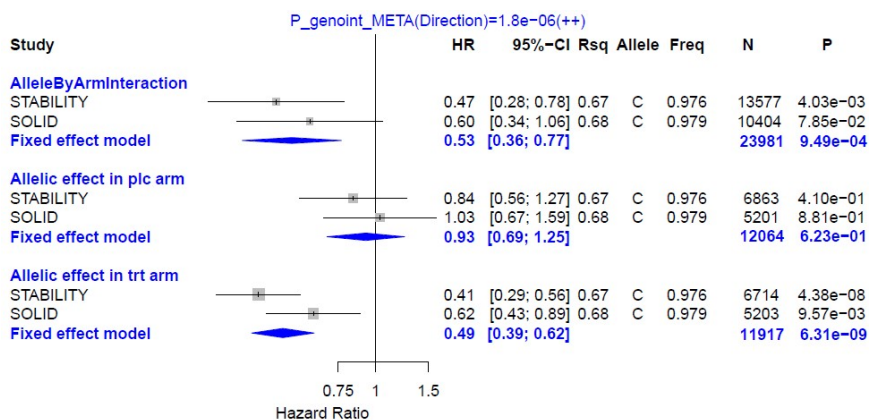

S5 Fig. c

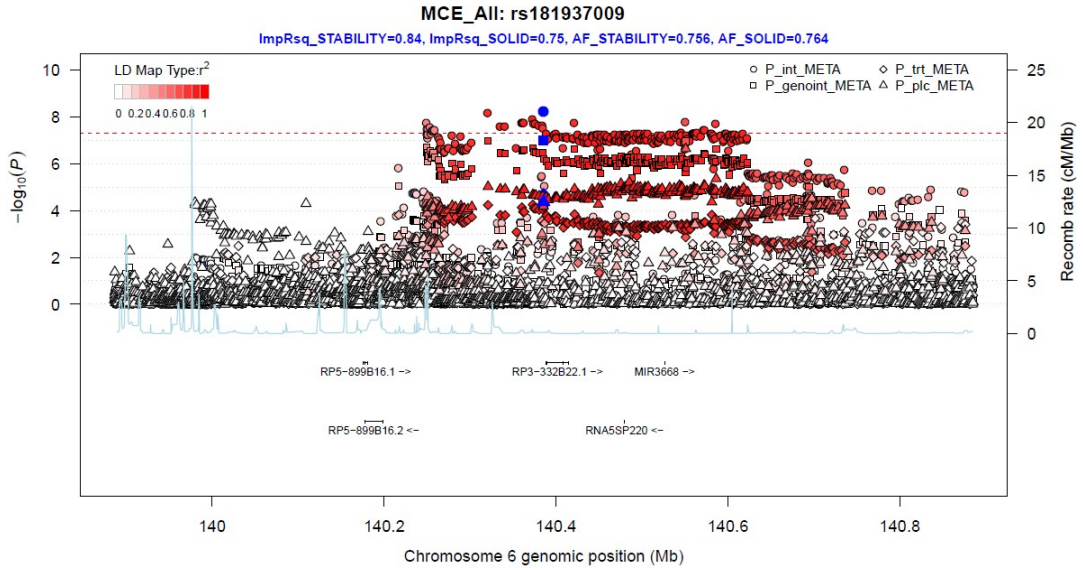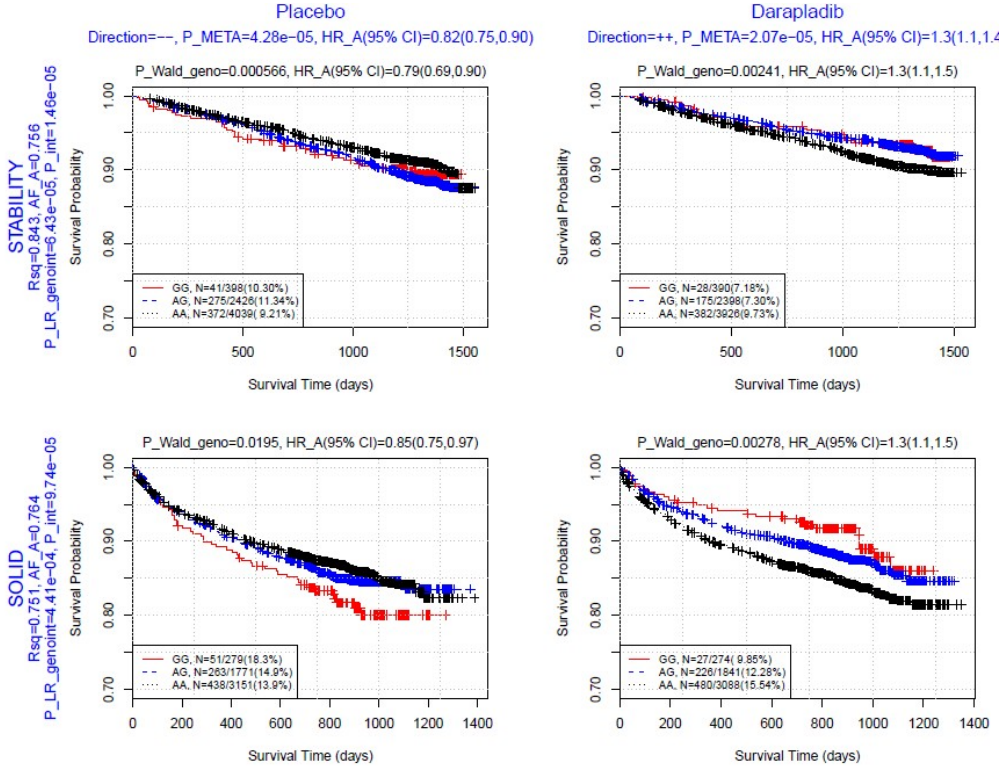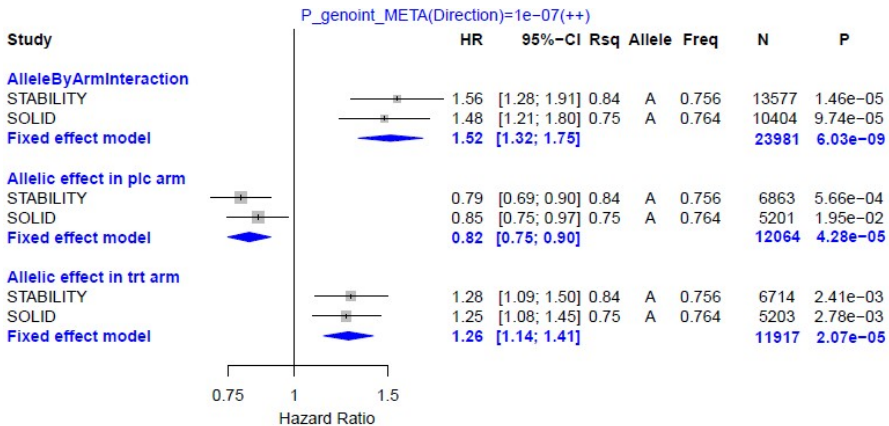

S5 Fig. d

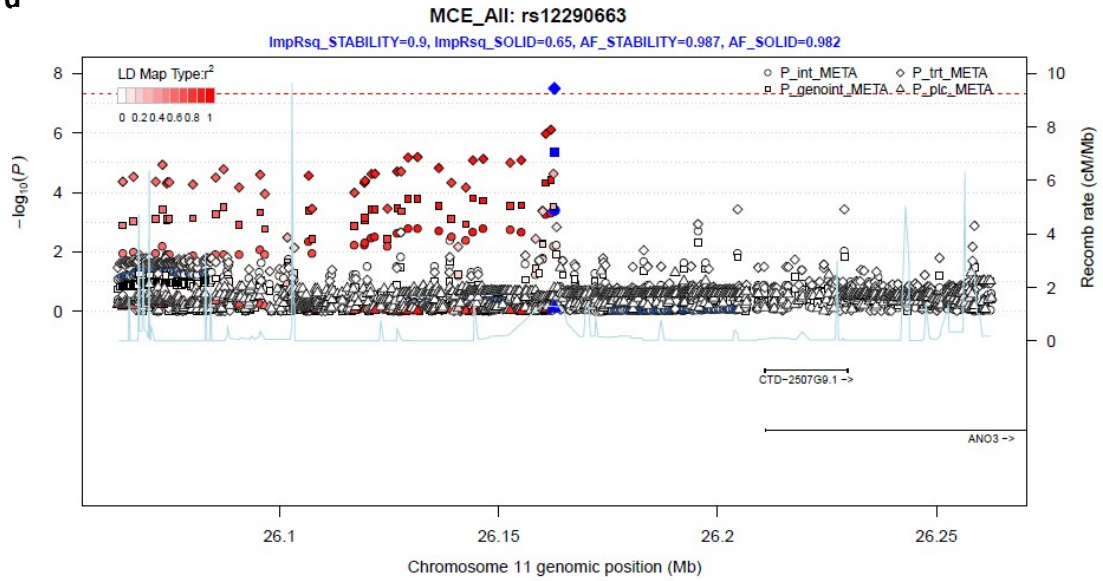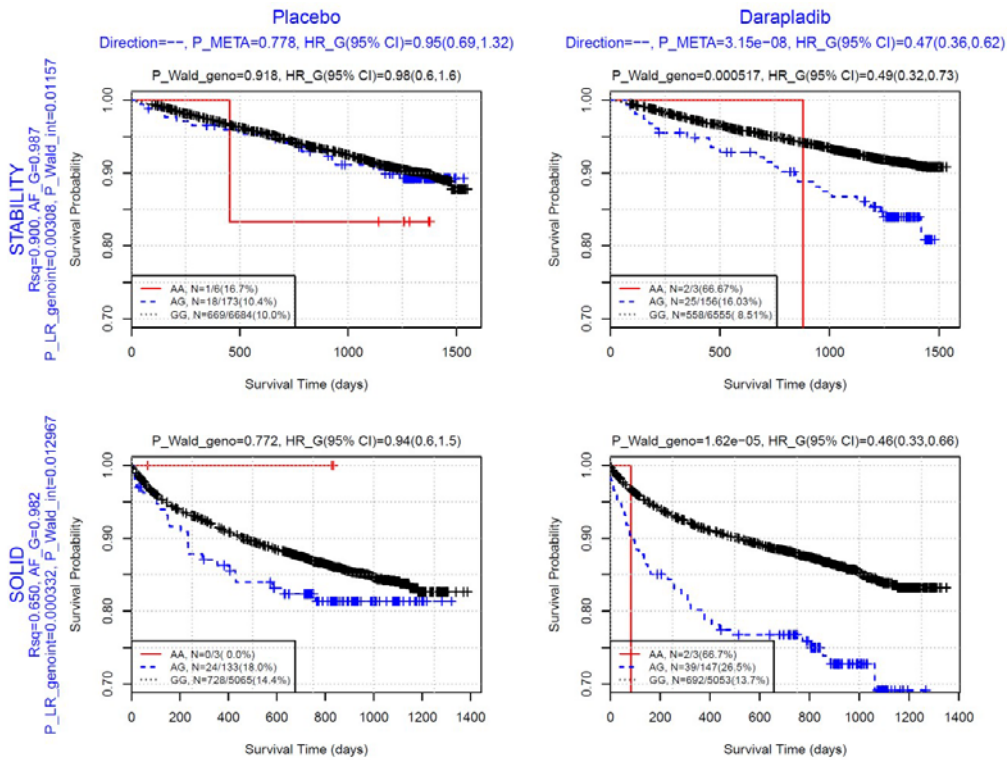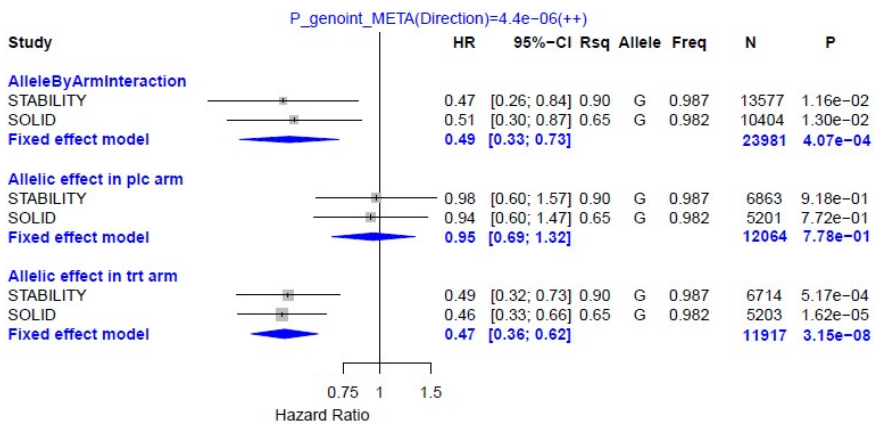

S5 Fig. e

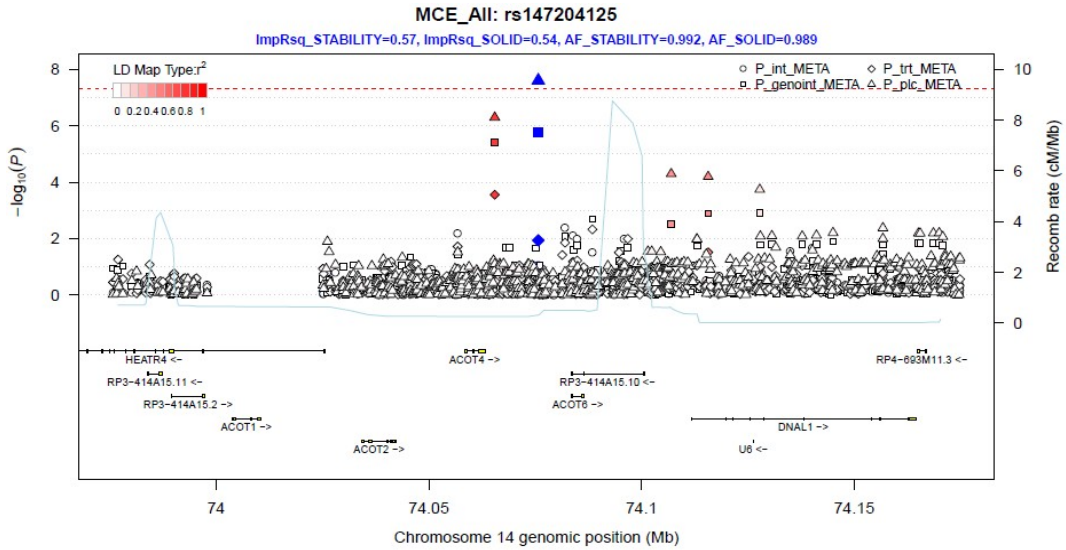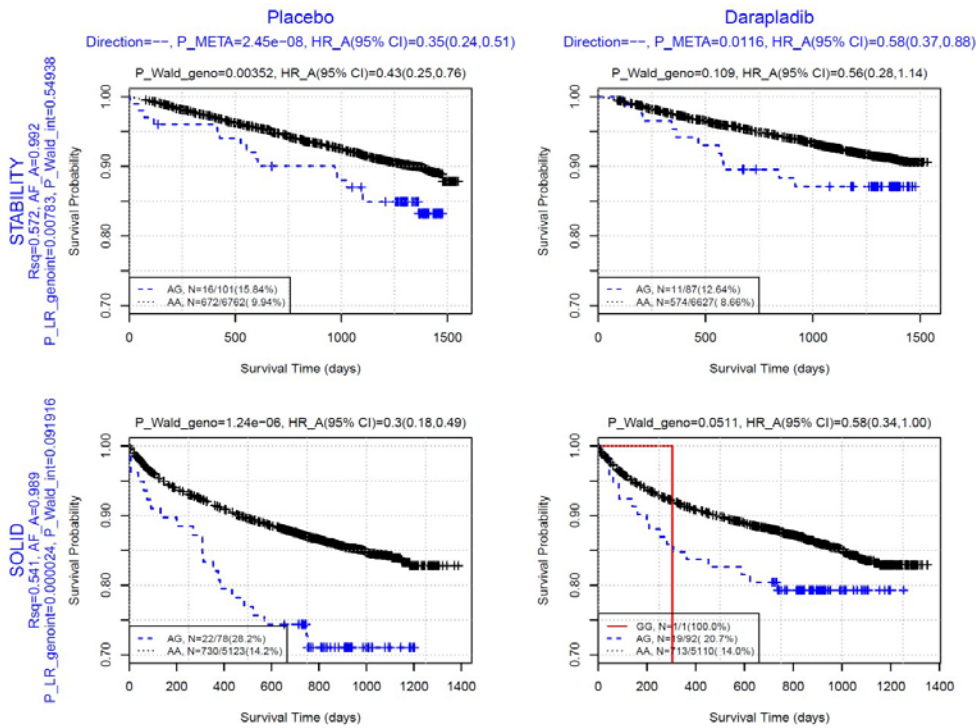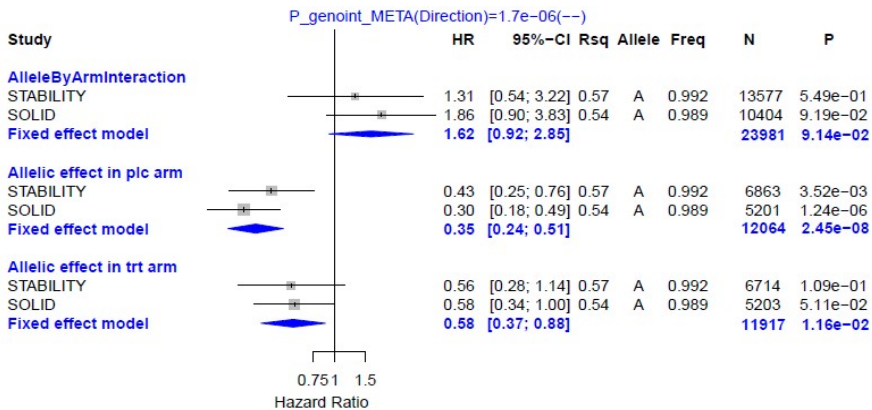

Supplement: pone.0182115.s006.pdf [file pone.0182115.s006.pdf]
