# Supplementary material for: Pharmacogenetic meta-analysis of baseline risk factors, pharmacodynamic, efficacy and tolerability endpoints from two large global cardiovascular outcomes trials for darapladib
Source: PubMed Central journal article supplement (PMC5533343; doi:10.1371/journal.pone.0182115), 2017-07-28

S2 Fig. Manhattan, QQ, and histogram for baseline Lp-PLA<sub>2</sub> activity.

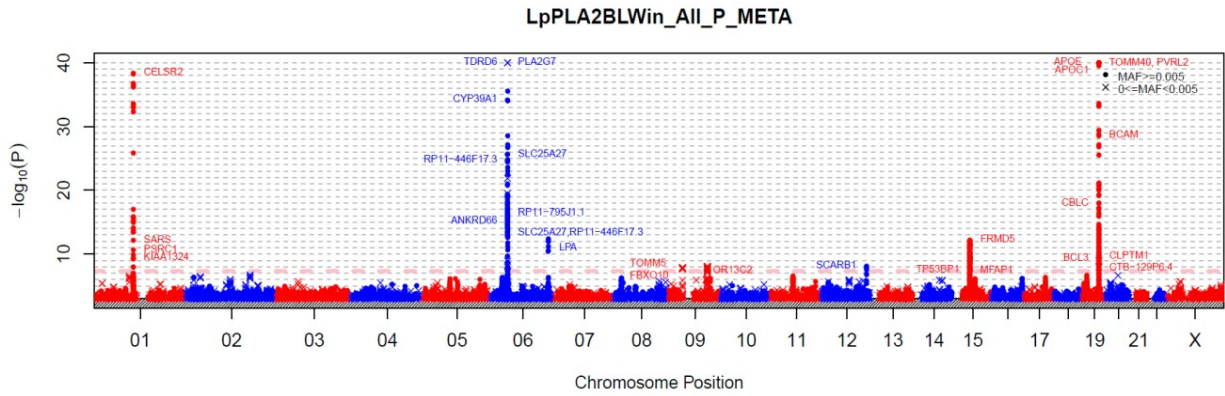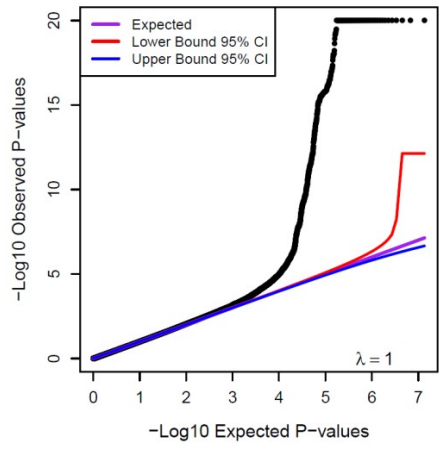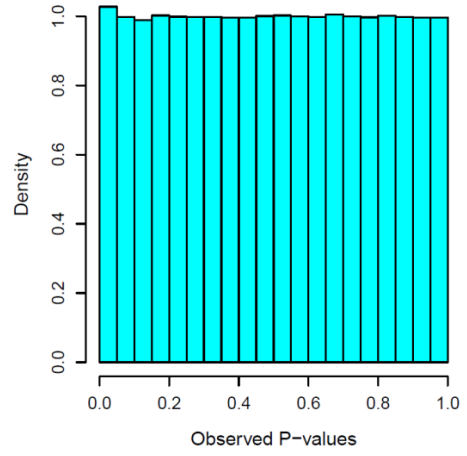

Supplement: pone.0182115.s003.pdf [file pone.0182115.s003.pdf]
