# Supplementary material for: Pharmacogenetic meta-analysis of baseline risk factors, pharmacodynamic, efficacy and tolerability endpoints from two large global cardiovascular outcomes trials for darapladib
Source: PubMed Central journal article supplement (PMC5533343; doi:10.1371/journal.pone.0182115), 2017-07-28

**S6 Fig. Regional, survival and forest plots of variants associated with MI following placebo and darapladib treatment.** The dashed line in the regional plots indicates the significance threshold. a) rs192476688, rs201052613, b) rs117714106.

S6 Fig. a

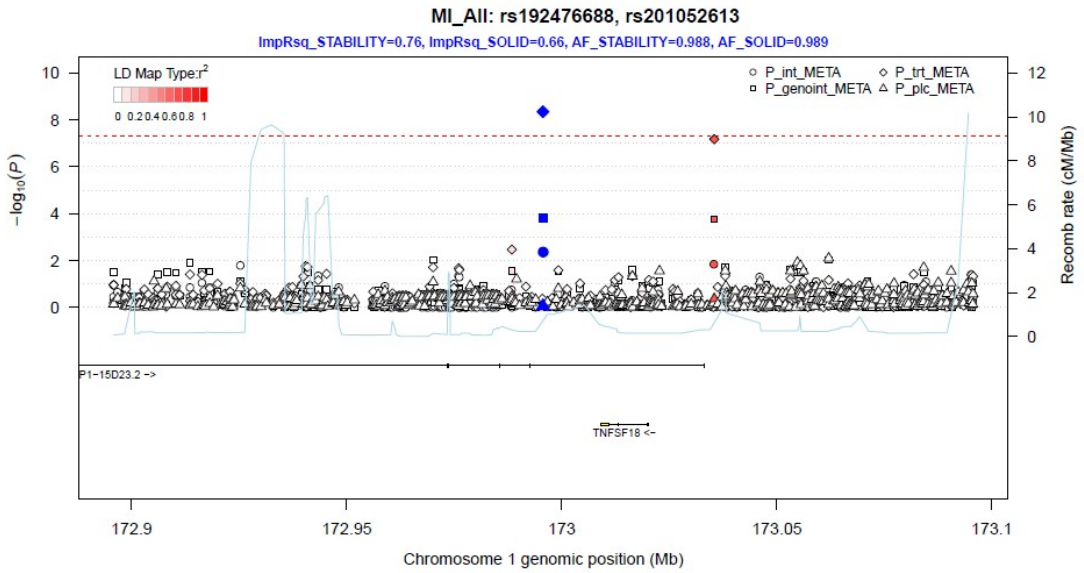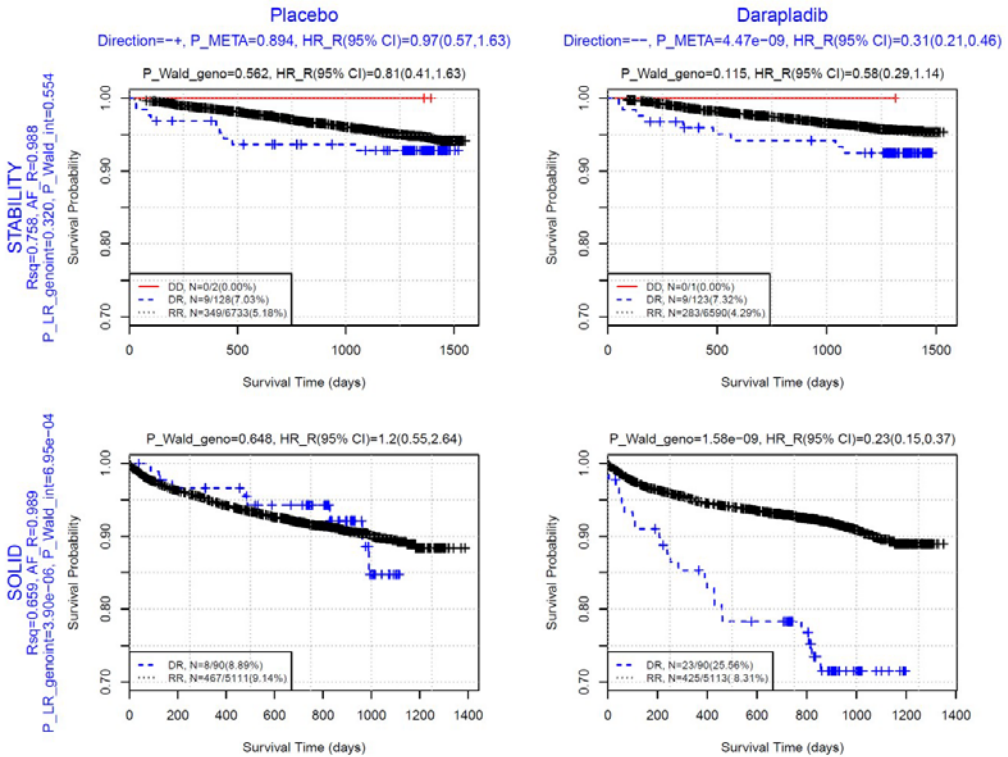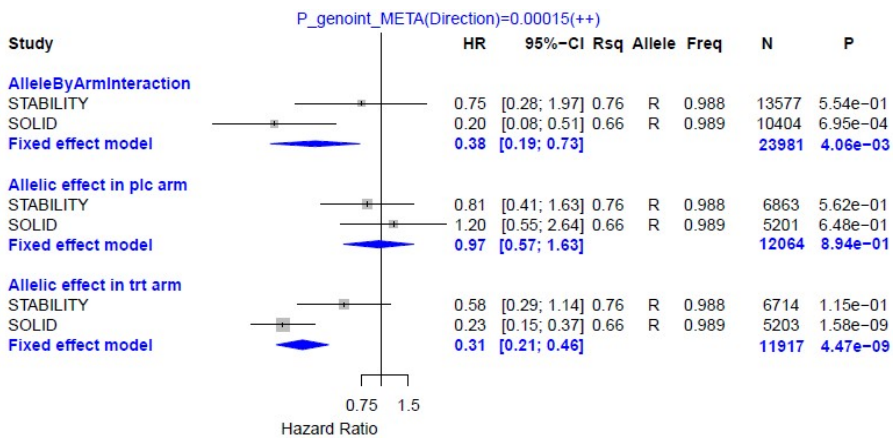

S6 Fig. b

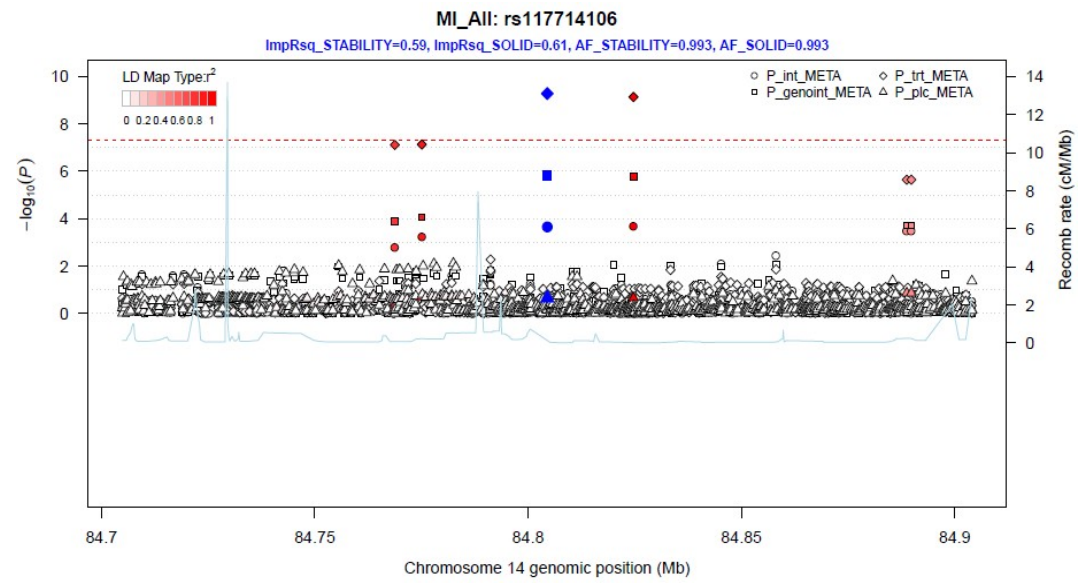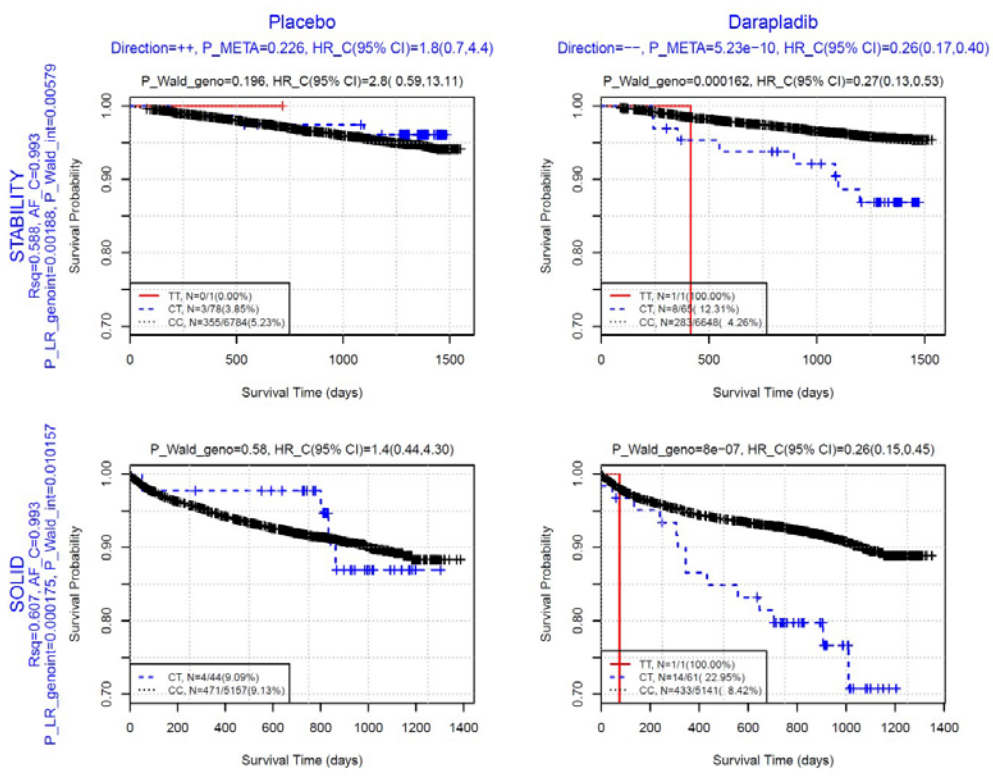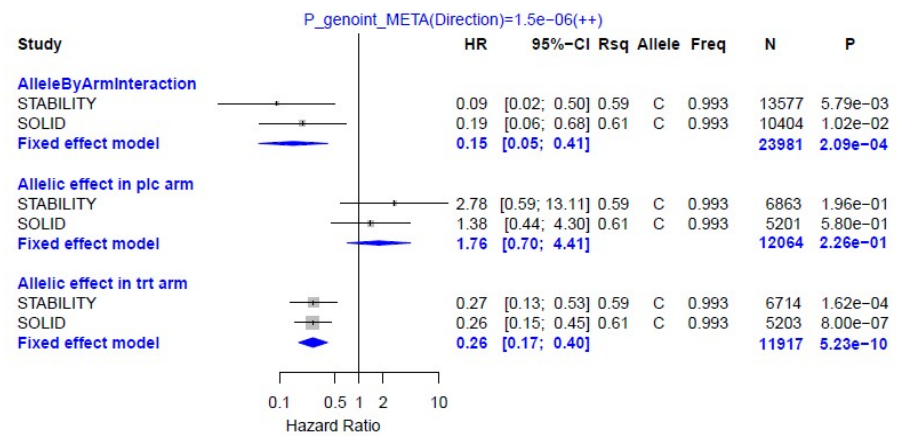

Supplement: pone.0182115.s007.pdf [file pone.0182115.s007.pdf]
