# Supplementary material for: Pharmacogenetic meta-analysis of baseline risk factors, pharmacodynamic, efficacy and tolerability endpoints from two large global cardiovascular outcomes trials for darapladib
Source: PubMed Central journal article supplement (PMC5533343; doi:10.1371/journal.pone.0182115), 2017-07-28

**S7 Fig. Manhattan, QQ and histogram plots for tolerability endpoints.** a) diarrhea in darapladib arm, b) moderate and severe diarrhea in darapladib arm, c) bathroom relate odor events in darapladib arm, d) non-bathroom relate odor events in darapladibarm.

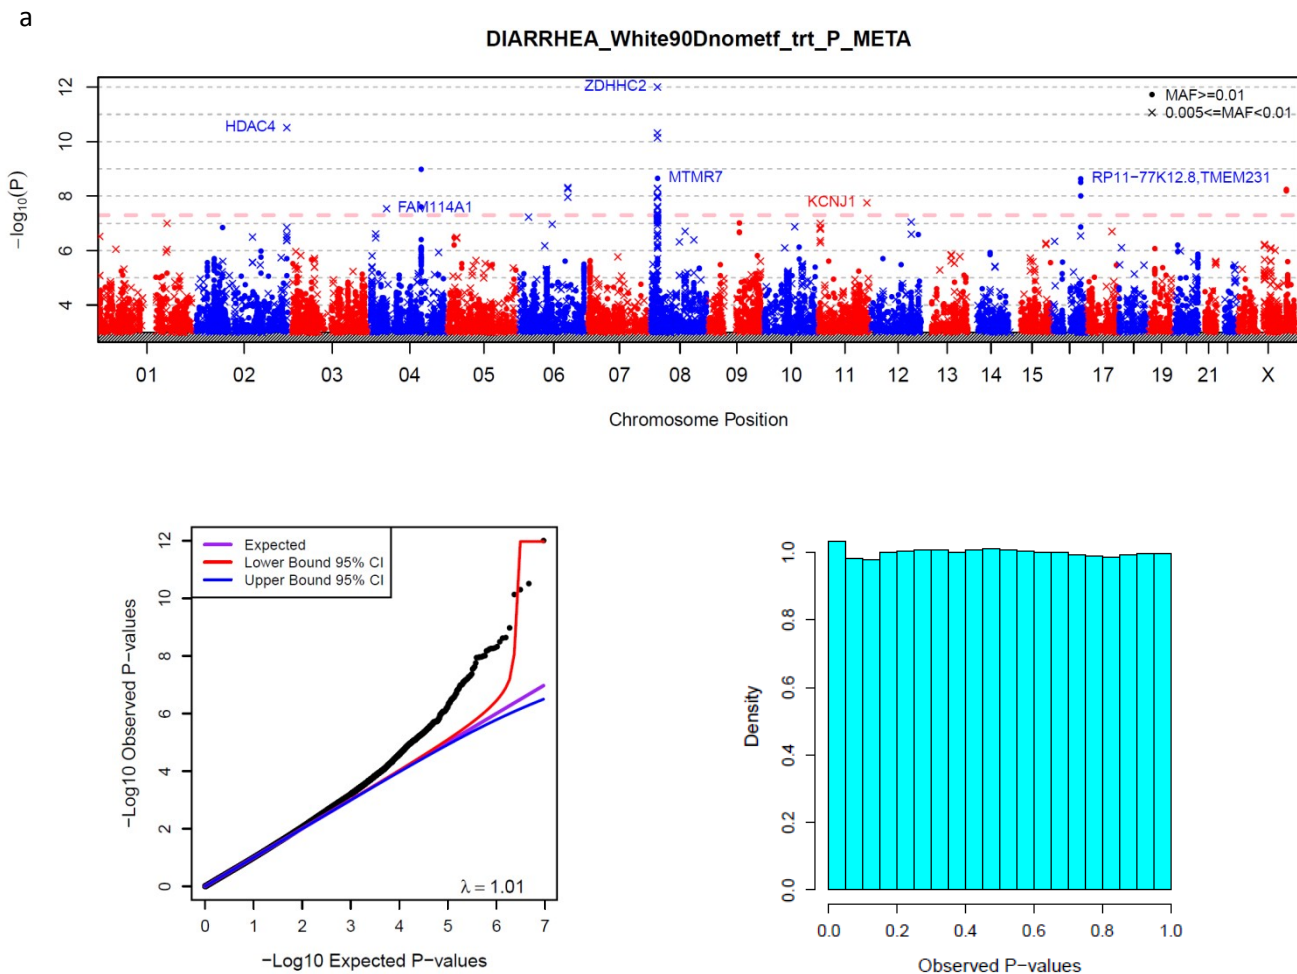

S7 Fig. b

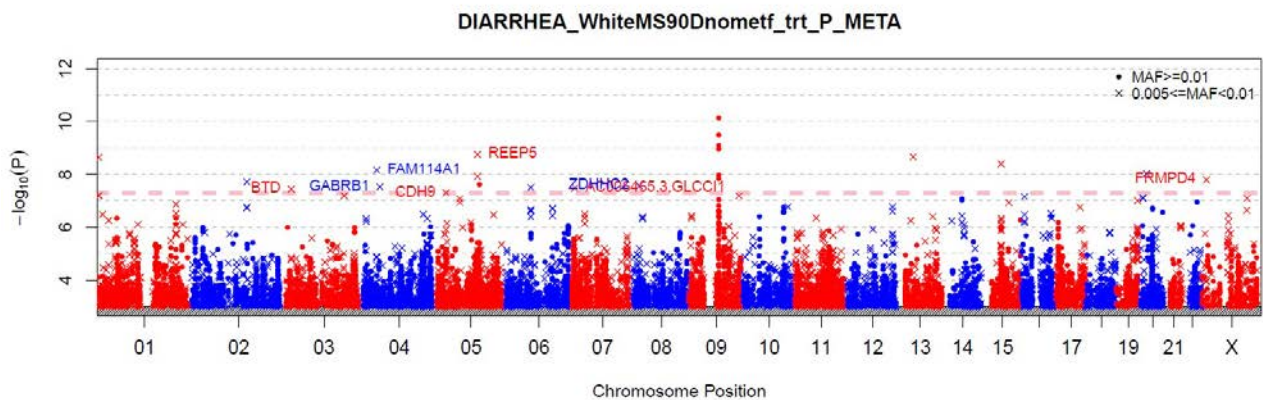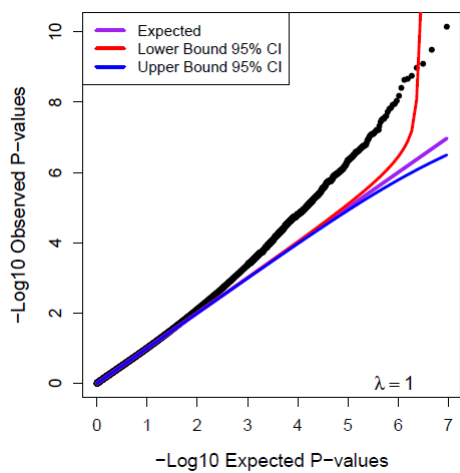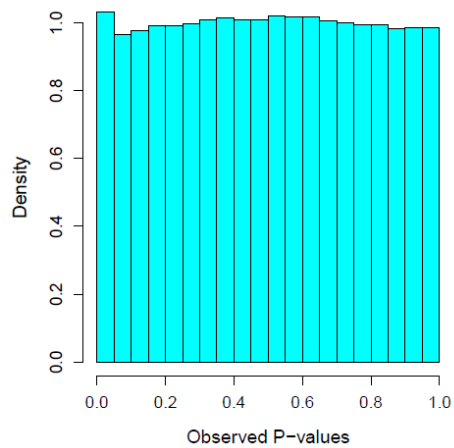

S7 Fig. c

ANYODOR\_BATH\_trt\_P\_META

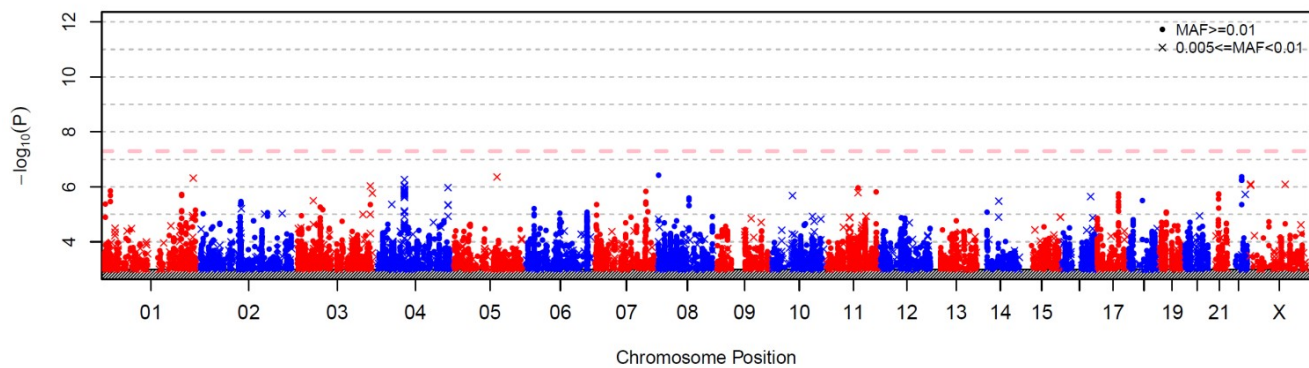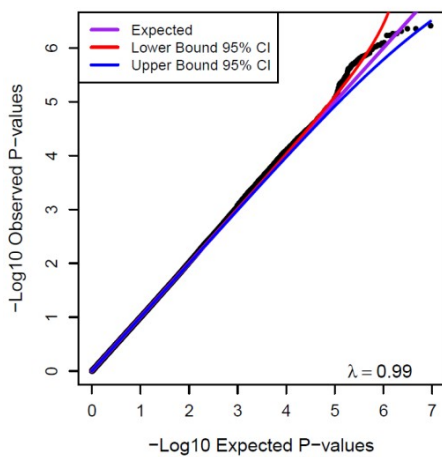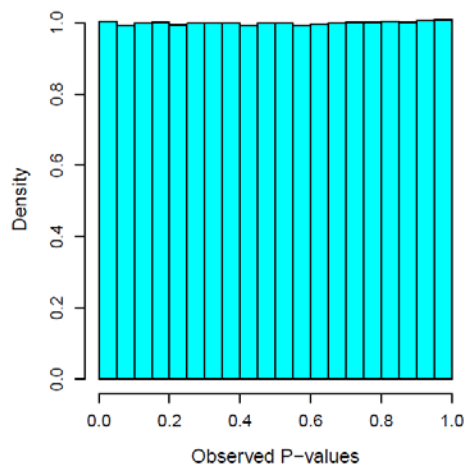

S7 Fig. d

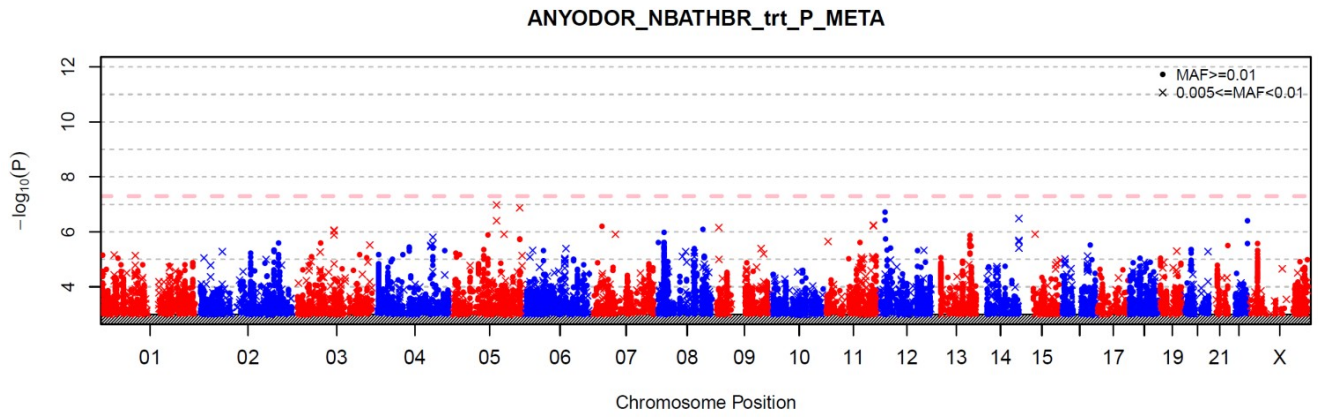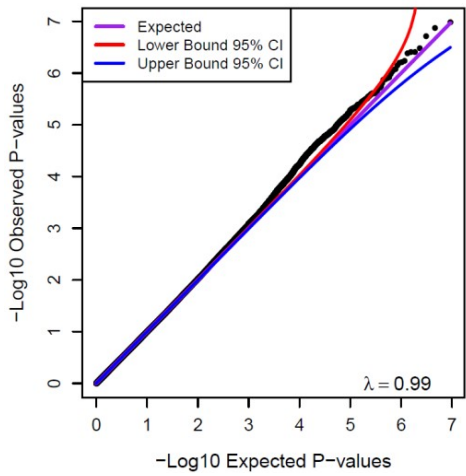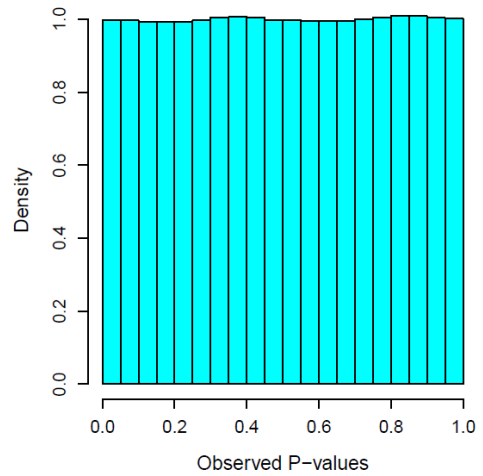

Supplement: pone.0182115.s008.pdf [file pone.0182115.s008.pdf]
