# Supplementary material for: Pharmacogenetic meta-analysis of baseline risk factors, pharmacodynamic, efficacy and tolerability endpoints from two large global cardiovascular outcomes trials for darapladib
Source: PubMed Central journal article supplement (PMC5533343; doi:10.1371/journal.pone.0182115), 2017-07-28

S9 Fig. Analysis population for diarrhea using STABILITY as an example.

PGx subgroup breakdown for the diarrhea tolerability endpoint

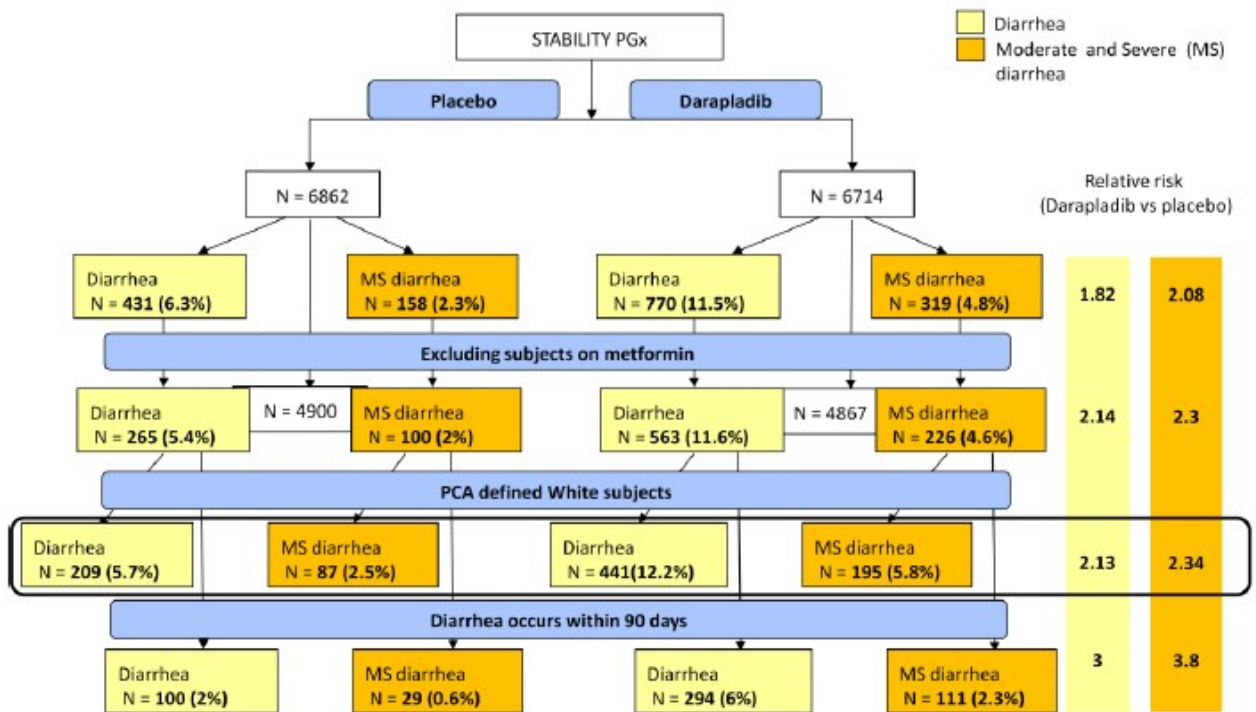

Supplement: pone.0182115.s010.pdf [file pone.0182115.s010.pdf]
