# Supplementary material for: Pharmacogenetic meta-analysis of baseline risk factors, pharmacodynamic, efficacy and tolerability endpoints from two large global cardiovascular outcomes trials for darapladib
Source: PubMed Central journal article supplement (PMC5533343; doi:10.1371/journal.pone.0182115), 2017-07-28

**S10 Fig. World map constructed using principle components from GWAS data of STABILITY subjects. Highlights the great diversity in country origin which is inherent to large clinical trials.**

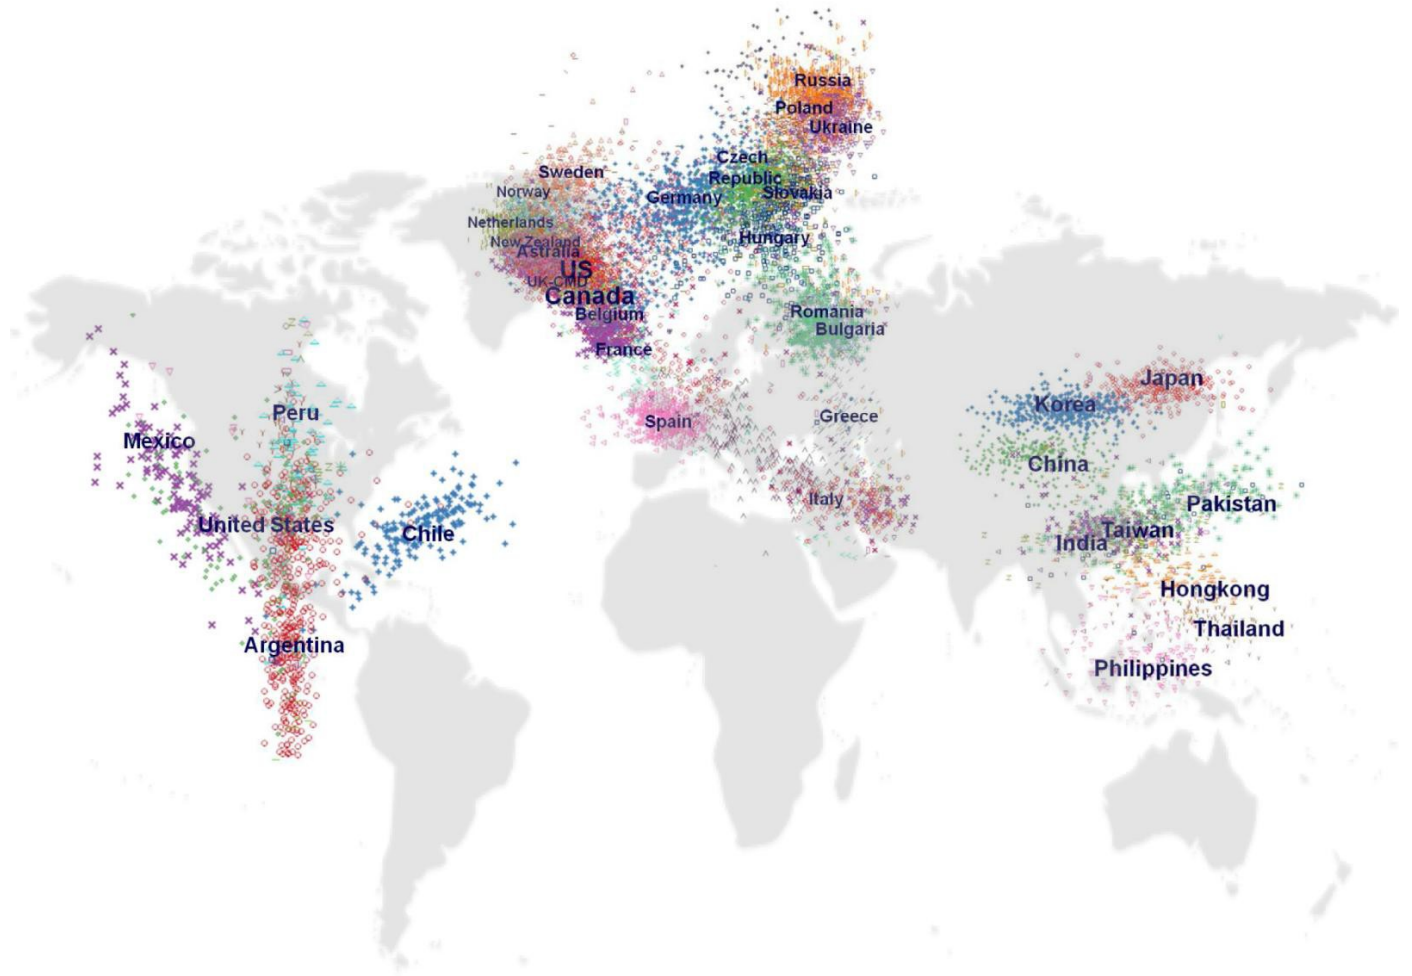

Supplement: pone.0182115.s011.pdf [file pone.0182115.s011.pdf]
