# Supplementary material for: Pharmacogenetic meta-analysis of baseline risk factors, pharmacodynamic, efficacy and tolerability endpoints from two large global cardiovascular outcomes trials for darapladib
Source: PubMed Central journal article supplement (PMC5533343; doi:10.1371/journal.pone.0182115), 2017-07-28

**S11 Fig. Baseline Lp-PLA<sub>2</sub> activity level plots for low frequency and rare variants in the *PLA2G7* gene conditioned on V279F. Main plot shows association P-values (main plot), with effect estimates in top right insert.**

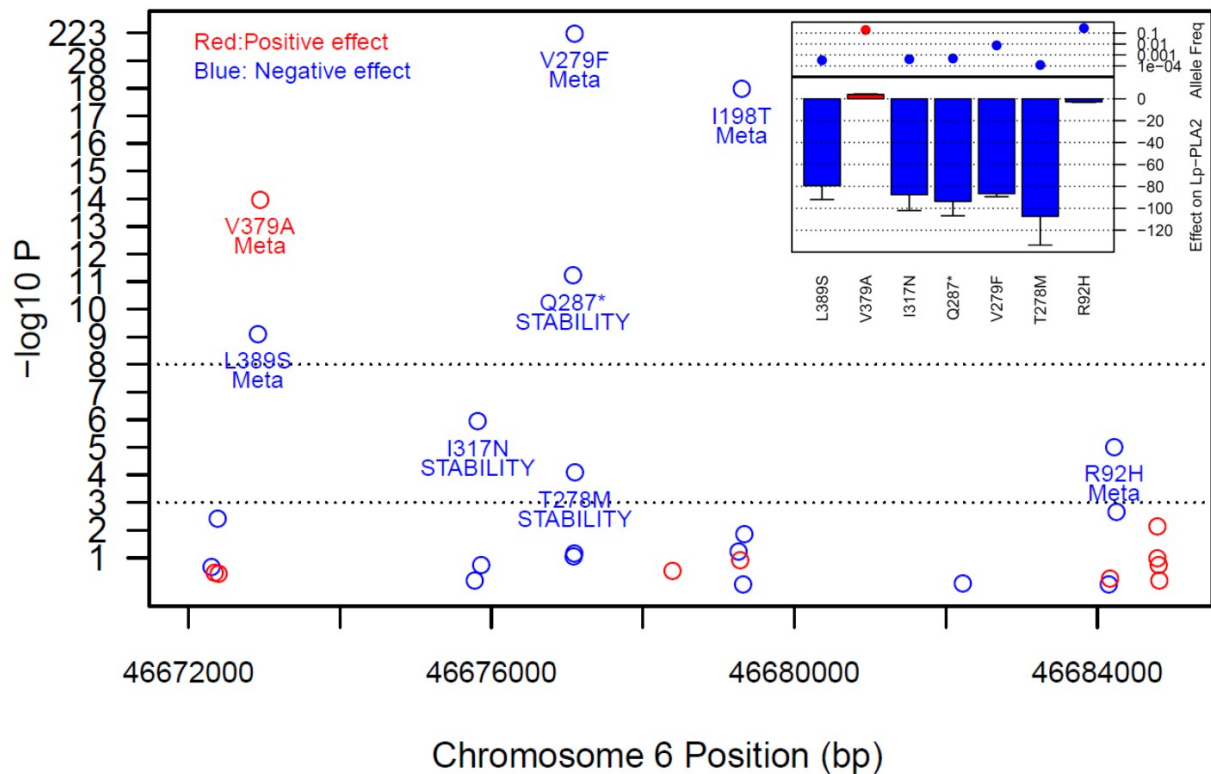

Supplement: pone.0182115.s012.pdf [file pone.0182115.s012.pdf]
