# Supplementary material for: Pharmacogenetic meta-analysis of baseline risk factors, pharmacodynamic, efficacy and tolerability endpoints from two large global cardiovascular outcomes trials for darapladib
Source: PLoS One. 2017 Jul 28;12(7):e0182115. doi: 10.1371/journal.pone.0182115 (PMC5533343; doi:10.1371/journal.pone.0182115)
Supplement: S6 Table — (XLSX) [file pone.0182115.s018.xlsx]

## Sheet: S6 Table
	Odor event rate
	STABILITY		SOLID-TIMI 52
Region	placebo	darapladib	placebo	darapladib
North America	0.0352532	0.233915	0.0472103	0.24964
Western Europe	0.0207595	0.154768	0.0339912	0.134361
Asia/Pacific	0.0324044	0.0929175	0.0145903	0.0738255
South America	0.00840336	0.0666667	0.0104822	0.0488323
Eastern Europe	0.00737379	0.0515581	0.00693333	0.0334928
